# Supplementary material
Source: PubMed Central journal article supplement (PMC9924078)
Supplement: PEDS_20151652SupplementaryData.pdf [file PEDS_20151652SupplementaryData.pdf]

## Supplemental Information

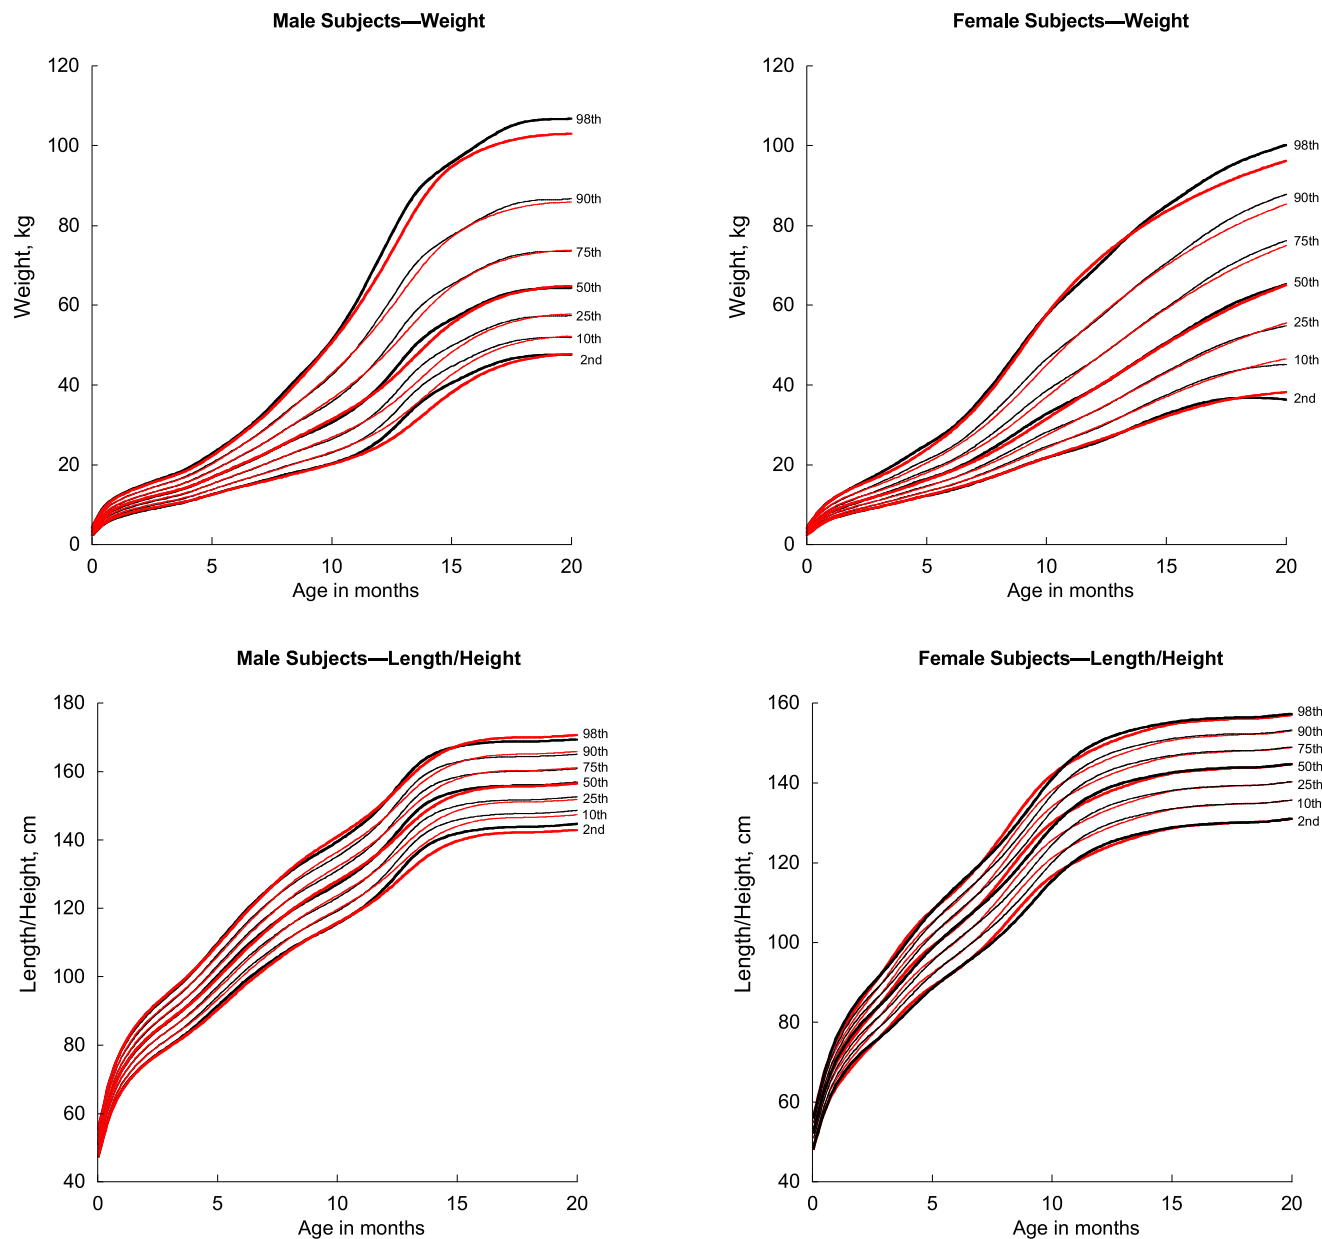

### SUPPLEMENTAL FIGURE 3

Comparison of DSGS curves for male and female subjects for length/height in centimeters and weight in kilograms using multiple observations per subject (complete sample) versus a single observation per subject (baseline visit only). Curves with black lines use measures from first visit only (1 observation per participant). Curves with red lines use measures from all visits (multiple observations for most participants).

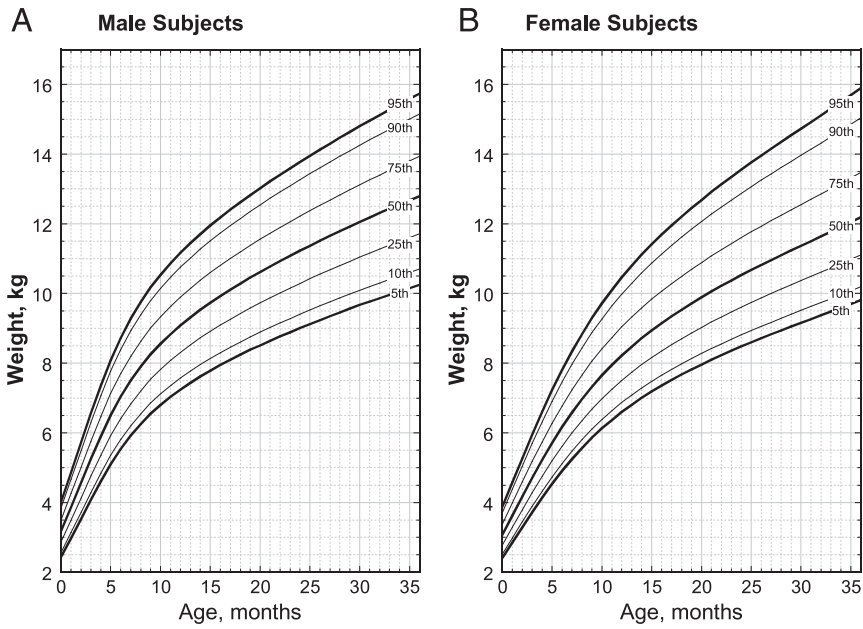

**SUPPLEMENTAL FIGURE 4**

Weight in kilograms for male and female subjects, birth to 36 months of age. Shown are the fifth, 10th, 25th, 50th, 75th, 90th, and 95th percentiles.

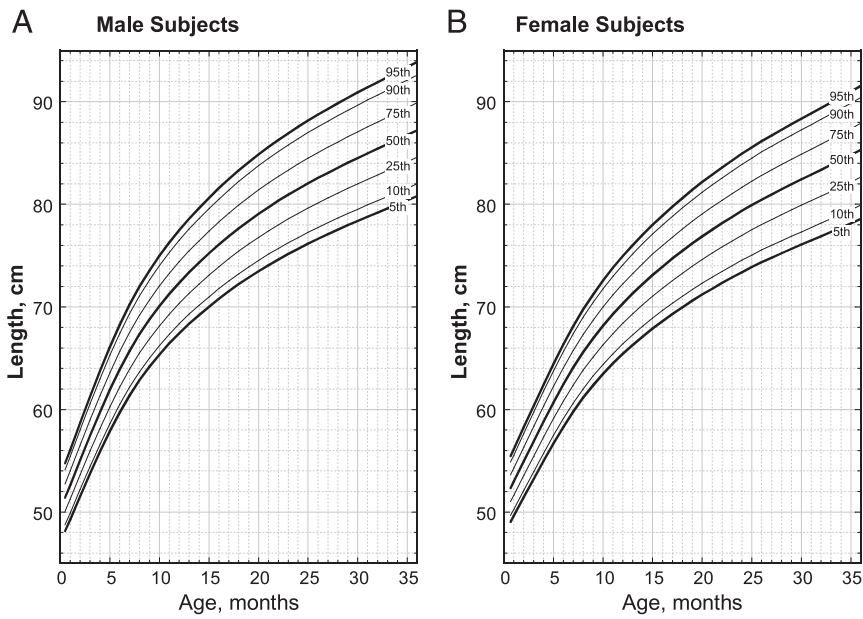

**SUPPLEMENTAL FIGURE 5**

Length in centimeters for male and female subjects, birth to 36 months of age. Shown are the fifth, 10th, 25th, 50th, 75th, 90th, and 95th percentiles.

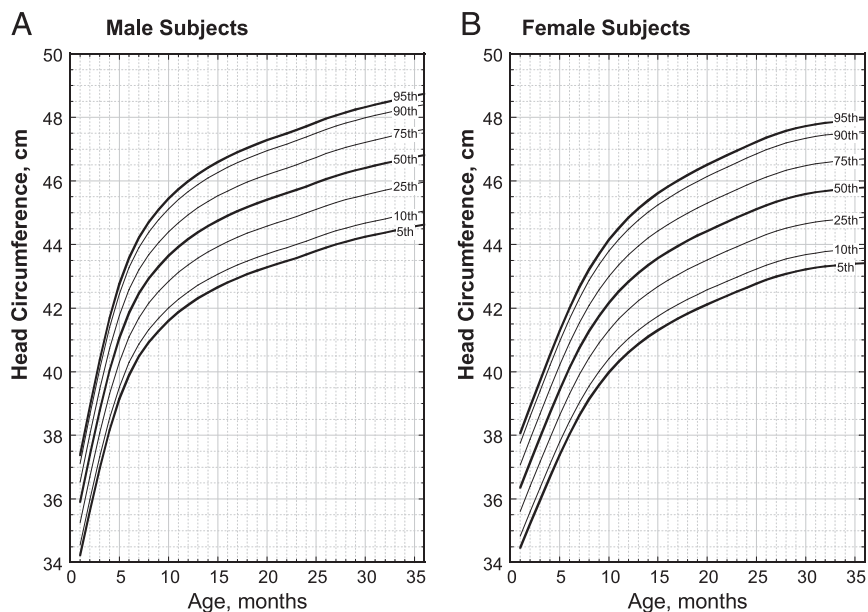**SUPPLEMENTAL FIGURE 6**

Head circumference in centimeters for male and female subjects, birth to 36 months of age. Shown are the fifth, 10th, 25th, 50th, 75th, 90th, and 95th percentiles.

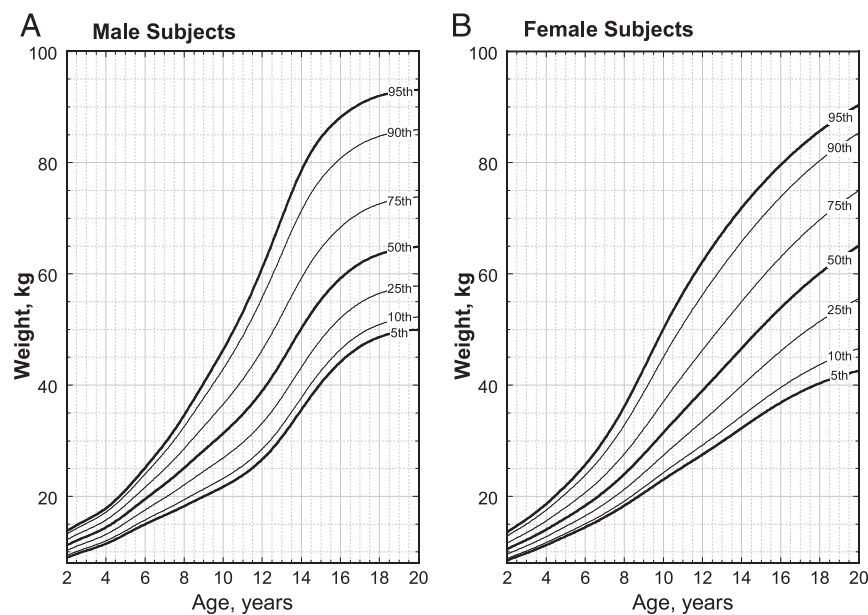**SUPPLEMENTAL FIGURE 7**

Weight in kilograms for male and female subjects, aged 2 through 20 years. Shown are the fifth, 10th, 25th, 50th, 75th, 90th, and 95th percentiles.

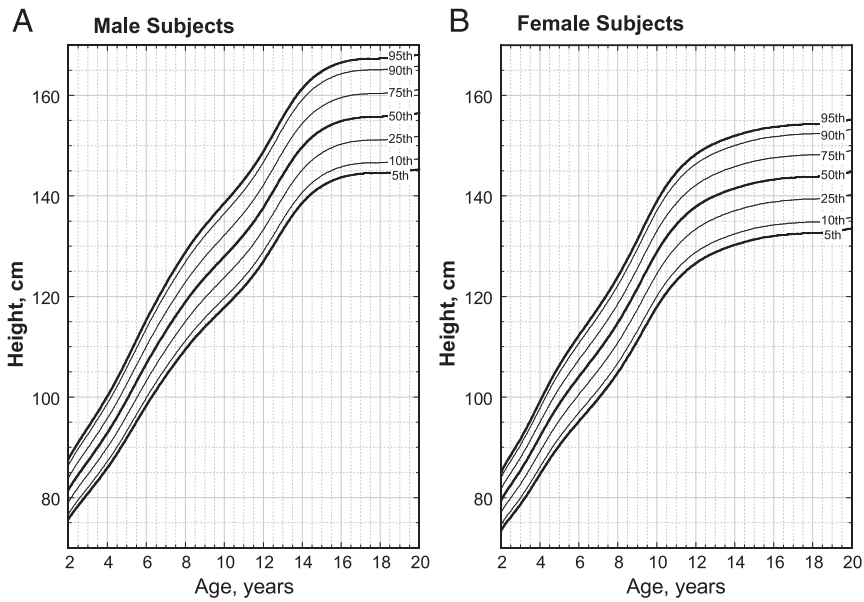

**SUPPLEMENTAL FIGURE 8**

Height in centimeters for male and female subjects, aged 2 through 20 years. Shown are the fifth, 10th, 25th, 50th, 75th, 90th, and 95th percentiles.

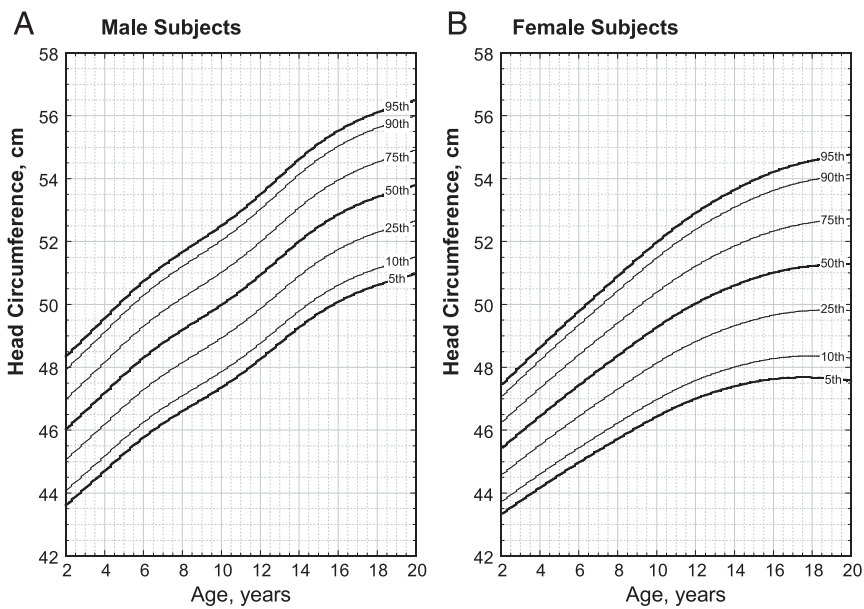

**SUPPLEMENTAL FIGURE 9**

Head circumference in centimeters for male and female subjects, aged 2 to 20 years. Shown are the fifth, 10th, 25th, 50th, 75th, 90th, and 95th percentiles.

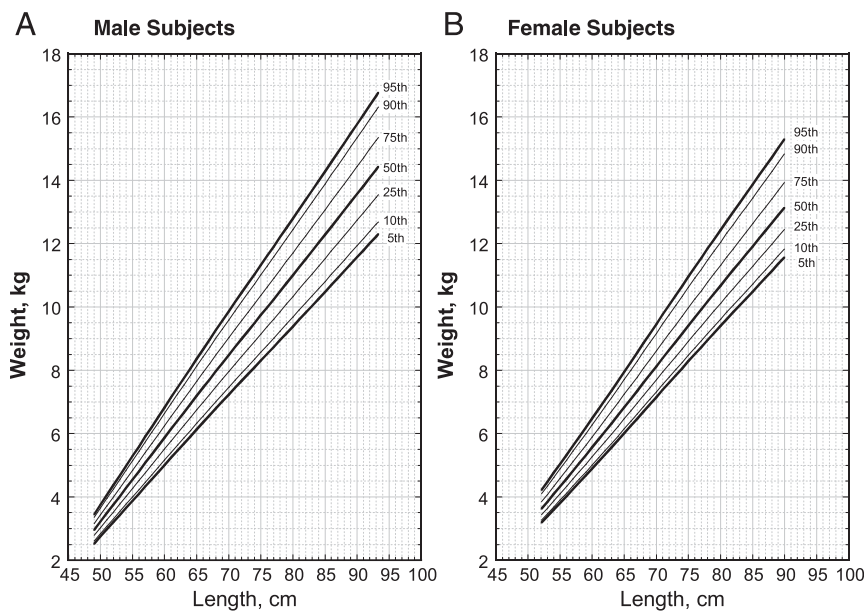**SUPPLEMENTAL FIGURE 10**

Weight (in kilograms)-for-length (in centimeters) for male and female subjects, birth to 36 months of age. Shown are the fifth, 10th, 25th, 50th, 75th, 90th, and 95th percentiles.

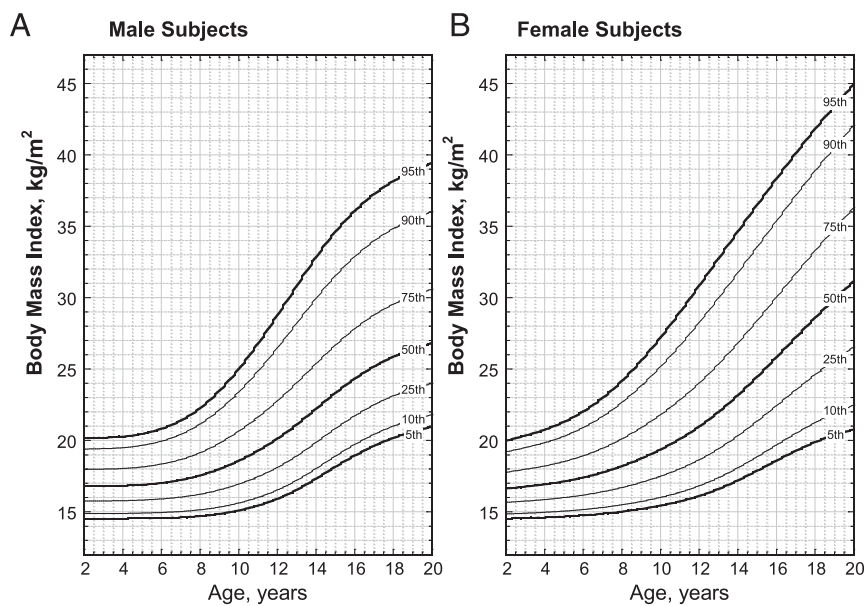**SUPPLEMENTAL FIGURE 11**

BMI for male and female subjects, aged 2 to 20 years. Shown are the fifth, 10th, 25th, 50th, 75th, 90th, and 95th percentiles.

**SUPPLEMENTAL TABLE 3** Characteristics of Children With DS Enrolled in DSGS, January 2010 to July 2013 (*N* = 637)

|                                            | Participants, <i>n</i> (%) | Observations, <i>n</i> (%) |
|--------------------------------------------|----------------------------|----------------------------|
| Sex                                        |                            |                            |
| Male                                       | 324 (51)                   | 786 (52)                   |
| Female                                     | 313 (49)                   | 734 (48)                   |
| Age at enrollment                          |                            |                            |
| 0–12 mo                                    | 89 (14)                    | 199 (13)                   |
| >12–36 mo                                  | 73 (11)                    | 340 (22)                   |
| >3 y                                       | 475 (75)                   | 981 (65)                   |
| Race/ethnicity                             |                            |                            |
| Non-Hispanic white                         | 464 (73)                   | 1099 (72)                  |
| Non-Hispanic black (or African American)   | 68 (11)                    | 150 (10)                   |
| Hispanic                                   | 58 (9)                     | 146 (10)                   |
| Other <sup>a</sup>                         | 47 (7)                     | 125 (8)                    |
| Geographic residence <sup>b,c</sup>        |                            |                            |
| Pennsylvania                               | 352 (57)                   |                            |
| New Jersey                                 | 180 (29)                   |                            |
| Texas                                      | 21 (3)                     |                            |
| New York                                   | 16 (3)                     |                            |
| Other states                               | 53 (9)                     |                            |
| Recruitment site <sup>c</sup>              |                            |                            |
| CHOP                                       | 512 (82)                   | 1368 (90)                  |
| Other sites                                | 118 (19)                   | 144 (10)                   |
| Number of visits per participant           |                            |                            |
| Only 1 visit                               | 239 (38)                   | 239 (16)                   |
| 2–3 visits                                 | 289 (45)                   | 738 (48)                   |
| 4–6 visits                                 | 93 (15)                    | 427 (28)                   |
| ≥7 visits                                  | 16 (2)                     | 116 (8)                    |
| Selected common comorbidities <sup>c</sup> |                            |                            |
| Atrioventricular canal defect              | 88 (15)                    | 227 (15)                   |
| Atrial septal defect                       | 97 (16)                    | 236 (16)                   |
| Ventricular septal defect                  | 125 (21)                   | 318 (22)                   |
| Patent ductus arteriosus                   | 95 (16)                    | 261 (18)                   |
| Tetralogy of Fallot                        | 13 (2)                     | 35 (2)                     |
| Other heart conditions                     | 82 (13)                    | 428 (16)                   |
| Pulmonary hypertension                     | 32 (5)                     | 87 (6)                     |
| Hypothyroidism                             | 125 (21)                   | 240 (16)                   |
| Hyperthyroidism                            | 14 (2)                     | 30 (2)                     |
| Prematurity                                |                            |                            |
| <37 wk gestational age                     | 82 (14)                    | 213 (15)                   |
| <34 wk gestational age                     | 40 (7)                     | 86 (6)                     |

<sup>a</sup> Other includes Asian, Native American, mixed race, and refused to report.

<sup>b</sup> Data not collected at follow-up visits.

<sup>c</sup> Information not available for all participants.

**SUPPLEMENTAL TABLE 4** Weight (Kilograms) for Age for Girls With DS, Ages Birth to 36 Months

| Age (mo) | L      | M      | S     | Percentile |     |      |      |      |      |      |      |      |
|----------|--------|--------|-------|------------|-----|------|------|------|------|------|------|------|
|          |        |        |       | 2nd        | 5th | 10th | 25th | 50th | 75th | 90th | 95th | 98th |
| 0        | 0.192  | 3.069  | 0.145 | 2.3        | 2.4 | 2.5  | 2.8  | 3.1  | 3.4  | 3.7  | 3.9  | 4.1  |
| 1        | 0.131  | 3.623  | 0.144 | 2.7        | 2.8 | 3.0  | 3.3  | 3.6  | 4.0  | 4.4  | 4.6  | 4.8  |
| 2        | 0.071  | 4.171  | 0.143 | 3.1        | 3.3 | 3.4  | 3.8  | 4.2  | 4.6  | 5.0  | 5.3  | 5.5  |
| 3        | 0.012  | 4.706  | 0.143 | 3.5        | 3.7 | 3.9  | 4.3  | 4.7  | 5.2  | 5.7  | 5.9  | 6.3  |
| 4        | -0.045 | 5.220  | 0.142 | 3.9        | 4.1 | 4.3  | 4.7  | 5.2  | 5.7  | 6.3  | 6.6  | 6.9  |
| 5        | -0.100 | 5.706  | 0.141 | 4.3        | 4.5 | 4.7  | 5.2  | 5.7  | 6.3  | 6.9  | 7.2  | 7.6  |
| 6        | -0.152 | 6.161  | 0.141 | 4.7        | 4.9 | 5.1  | 5.6  | 6.2  | 6.8  | 7.5  | 7.8  | 8.2  |
| 7        | -0.201 | 6.582  | 0.141 | 5.0        | 5.2 | 5.5  | 6.0  | 6.6  | 7.2  | 8.0  | 8.3  | 8.8  |
| 8        | -0.248 | 6.968  | 0.140 | 5.3        | 5.6 | 5.8  | 6.4  | 7.0  | 7.7  | 8.4  | 8.8  | 9.3  |
| 9        | -0.291 | 7.323  | 0.140 | 5.6        | 5.9 | 6.1  | 6.7  | 7.3  | 8.1  | 8.9  | 9.3  | 9.8  |
| 10       | -0.331 | 7.648  | 0.140 | 5.9        | 6.1 | 6.4  | 7.0  | 7.6  | 8.4  | 9.3  | 9.7  | 10.3 |
| 11       | -0.368 | 7.947  | 0.140 | 6.1        | 6.4 | 6.6  | 7.3  | 7.9  | 8.7  | 9.6  | 10.1 | 10.7 |
| 12       | -0.402 | 8.223  | 0.140 | 6.3        | 6.6 | 6.9  | 7.5  | 8.2  | 9.0  | 10.0 | 10.5 | 11.1 |
| 13       | -0.434 | 8.478  | 0.140 | 6.5        | 6.8 | 7.1  | 7.7  | 8.5  | 9.3  | 10.3 | 10.8 | 11.4 |
| 14       | -0.463 | 8.716  | 0.140 | 6.7        | 7.0 | 7.3  | 8.0  | 8.7  | 9.6  | 10.6 | 11.1 | 11.8 |
| 15       | -0.490 | 8.939  | 0.140 | 6.9        | 7.2 | 7.5  | 8.2  | 8.9  | 9.8  | 10.9 | 11.4 | 12.1 |
| 16       | -0.515 | 9.148  | 0.140 | 7.0        | 7.4 | 7.7  | 8.4  | 9.1  | 10.1 | 11.1 | 11.7 | 12.4 |
| 17       | -0.539 | 9.346  | 0.140 | 7.2        | 7.5 | 7.8  | 8.5  | 9.3  | 10.3 | 11.4 | 12.0 | 12.7 |
| 18       | -0.561 | 9.535  | 0.140 | 7.3        | 7.7 | 8.0  | 8.7  | 9.5  | 10.5 | 11.6 | 12.2 | 12.9 |
| 19       | -0.582 | 9.716  | 0.140 | 7.5        | 7.8 | 8.1  | 8.9  | 9.7  | 10.7 | 11.8 | 12.5 | 13.2 |
| 20       | -0.601 | 9.889  | 0.141 | 7.6        | 8.0 | 8.3  | 9.0  | 9.9  | 10.9 | 12.1 | 12.7 | 13.5 |
| 21       | -0.620 | 10.056 | 0.141 | 7.8        | 8.1 | 8.4  | 9.2  | 10.1 | 11.1 | 12.3 | 12.9 | 13.7 |
| 22       | -0.637 | 10.217 | 0.141 | 7.9        | 8.2 | 8.6  | 9.3  | 10.2 | 11.3 | 12.5 | 13.1 | 13.9 |
| 23       | -0.654 | 10.374 | 0.141 | 8.0        | 8.4 | 8.7  | 9.5  | 10.4 | 11.4 | 12.7 | 13.3 | 14.2 |
| 24       | -0.670 | 10.526 | 0.141 | 8.1        | 8.5 | 8.8  | 9.6  | 10.5 | 11.6 | 12.9 | 13.6 | 14.4 |
| 25       | -0.686 | 10.674 | 0.142 | 8.2        | 8.6 | 8.9  | 9.7  | 10.7 | 11.8 | 13.1 | 13.8 | 14.6 |
| 26       | -0.700 | 10.819 | 0.142 | 8.4        | 8.7 | 9.1  | 9.9  | 10.8 | 11.9 | 13.3 | 14.0 | 14.8 |
| 27       | -0.715 | 10.960 | 0.142 | 8.5        | 8.8 | 9.2  | 10.0 | 11.0 | 12.1 | 13.4 | 14.2 | 15.1 |
| 28       | -0.729 | 11.098 | 0.142 | 8.6        | 8.9 | 9.3  | 10.1 | 11.1 | 12.2 | 13.6 | 14.3 | 15.3 |
| 29       | -0.742 | 11.235 | 0.143 | 8.7        | 9.0 | 9.4  | 10.2 | 11.2 | 12.4 | 13.8 | 14.5 | 15.5 |
| 30       | -0.755 | 11.370 | 0.143 | 8.8        | 9.2 | 9.5  | 10.4 | 11.4 | 12.6 | 14.0 | 14.7 | 15.7 |
| 31       | -0.768 | 11.504 | 0.143 | 8.9        | 9.3 | 9.6  | 10.5 | 11.5 | 12.7 | 14.1 | 14.9 | 15.9 |
| 32       | -0.781 | 11.639 | 0.143 | 9.0        | 9.4 | 9.7  | 10.6 | 11.6 | 12.9 | 14.3 | 15.1 | 16.1 |
| 33       | -0.794 | 11.774 | 0.144 | 9.1        | 9.5 | 9.8  | 10.7 | 11.8 | 13.0 | 14.5 | 15.3 | 16.3 |
| 34       | -0.807 | 11.911 | 0.144 | 9.2        | 9.6 | 10.0 | 10.9 | 11.9 | 13.2 | 14.7 | 15.5 | 16.5 |
| 35       | -0.819 | 12.049 | 0.144 | 9.3        | 9.7 | 10.1 | 11.0 | 12.0 | 13.3 | 14.9 | 15.7 | 16.8 |
| 36       | -0.832 | 12.190 | 0.145 | 9.4        | 9.8 | 10.2 | 11.1 | 12.2 | 13.5 | 15.0 | 15.9 | 17.0 |



**SUPPLEMENTAL TABLE 5** Length (Centimeters) for Age for Girls With DS, Ages Birth to 36 Months

| Age (mo) | L     | M      | S     | Percentile |      |      |      |      |      |      |      |      |
|----------|-------|--------|-------|------------|------|------|------|------|------|------|------|------|
|          |       |        |       | 2nd        | 5th  | 10th | 25th | 50th | 75th | 90th | 95th | 98th |
| 1        | 1.957 | 52.958 | 0.037 | 48.8       | 49.6 | 50.3 | 51.6 | 53.0 | 54.3 | 55.5 | 56.1 | 56.8 |
| 2        | 1.957 | 54.934 | 0.038 | 50.6       | 51.4 | 52.1 | 53.5 | 54.9 | 56.3 | 57.6 | 58.2 | 58.9 |
| 3        | 1.957 | 56.904 | 0.038 | 52.4       | 53.2 | 53.9 | 55.4 | 56.9 | 58.3 | 59.7 | 60.4 | 61.1 |
| 4        | 1.957 | 58.840 | 0.038 | 54.1       | 55.0 | 55.7 | 57.3 | 58.8 | 60.3 | 61.8 | 62.5 | 63.2 |
| 5        | 1.957 | 60.704 | 0.039 | 55.8       | 56.7 | 57.5 | 59.1 | 60.7 | 62.3 | 63.8 | 64.5 | 65.2 |
| 6        | 1.957 | 62.466 | 0.039 | 57.4       | 58.3 | 59.1 | 60.8 | 62.5 | 64.1 | 65.6 | 66.4 | 67.2 |
| 7        | 1.957 | 64.100 | 0.039 | 58.8       | 59.8 | 60.6 | 62.4 | 64.1 | 65.8 | 67.4 | 68.1 | 69.0 |
| 8        | 1.957 | 65.594 | 0.040 | 60.2       | 61.2 | 62.0 | 63.8 | 65.6 | 67.3 | 69.0 | 69.8 | 70.6 |
| 9        | 1.957 | 66.953 | 0.040 | 61.4       | 62.4 | 63.3 | 65.1 | 67.0 | 68.7 | 70.4 | 71.2 | 72.1 |
| 10       | 1.957 | 68.190 | 0.040 | 62.4       | 63.5 | 64.4 | 66.3 | 68.2 | 70.0 | 71.8 | 72.6 | 73.5 |
| 11       | 1.957 | 69.318 | 0.041 | 63.4       | 64.5 | 65.4 | 67.4 | 69.3 | 71.2 | 73.0 | 73.8 | 74.8 |
| 12       | 1.957 | 70.357 | 0.041 | 64.3       | 65.4 | 66.4 | 68.4 | 70.4 | 72.3 | 74.1 | 75.0 | 75.9 |
| 13       | 1.957 | 71.328 | 0.041 | 65.2       | 66.3 | 67.3 | 69.3 | 71.3 | 73.3 | 75.2 | 76.0 | 77.0 |
| 14       | 1.957 | 72.244 | 0.042 | 66.0       | 67.1 | 68.1 | 70.2 | 72.2 | 74.2 | 76.2 | 77.0 | 78.0 |
| 15       | 1.957 | 73.115 | 0.042 | 66.7       | 67.9 | 68.9 | 71.0 | 73.1 | 75.1 | 77.1 | 78.0 | 79.0 |
| 16       | 1.957 | 73.942 | 0.042 | 67.4       | 68.6 | 69.7 | 71.8 | 73.9 | 76.0 | 78.0 | 78.9 | 80.0 |
| 17       | 1.957 | 74.729 | 0.043 | 68.1       | 69.3 | 70.4 | 72.6 | 74.7 | 76.8 | 78.9 | 79.8 | 80.8 |
| 18       | 1.957 | 75.477 | 0.043 | 68.7       | 70.0 | 71.0 | 73.3 | 75.5 | 77.6 | 79.7 | 80.6 | 81.7 |
| 19       | 1.957 | 76.190 | 0.043 | 69.3       | 70.6 | 71.7 | 74.0 | 76.2 | 78.3 | 80.4 | 81.4 | 82.5 |
| 20       | 1.957 | 76.872 | 0.043 | 69.9       | 71.2 | 72.3 | 74.6 | 76.9 | 79.1 | 81.2 | 82.2 | 83.3 |
| 21       | 1.957 | 77.529 | 0.043 | 70.5       | 71.8 | 72.9 | 75.3 | 77.5 | 79.7 | 81.9 | 82.9 | 84.0 |
| 22       | 1.957 | 78.163 | 0.044 | 71.0       | 72.3 | 73.5 | 75.9 | 78.2 | 80.4 | 82.6 | 83.6 | 84.7 |
| 23       | 1.957 | 78.774 | 0.044 | 71.5       | 72.9 | 74.0 | 76.4 | 78.8 | 81.0 | 83.3 | 84.3 | 85.4 |
| 24       | 1.957 | 79.361 | 0.044 | 72.0       | 73.4 | 74.6 | 77.0 | 79.4 | 81.7 | 83.9 | 84.9 | 86.1 |
| 25       | 1.957 | 79.925 | 0.044 | 72.5       | 73.9 | 75.1 | 77.5 | 79.9 | 82.3 | 84.5 | 85.6 | 86.7 |
| 26       | 1.957 | 80.465 | 0.044 | 73.0       | 74.4 | 75.5 | 78.0 | 80.5 | 82.8 | 85.1 | 86.2 | 87.3 |
| 27       | 1.957 | 80.982 | 0.045 | 73.4       | 74.8 | 76.0 | 78.5 | 81.0 | 83.4 | 85.7 | 86.7 | 87.9 |
| 28       | 1.957 | 81.480 | 0.045 | 73.8       | 75.2 | 76.5 | 79.0 | 81.5 | 83.9 | 86.2 | 87.3 | 88.5 |
| 29       | 1.957 | 81.964 | 0.045 | 74.2       | 75.7 | 76.9 | 79.5 | 82.0 | 84.4 | 86.7 | 87.8 | 89.0 |
| 30       | 1.957 | 82.438 | 0.045 | 74.6       | 76.1 | 77.3 | 79.9 | 82.4 | 84.9 | 87.3 | 88.4 | 89.6 |
| 31       | 1.957 | 82.908 | 0.045 | 75.0       | 76.5 | 77.7 | 80.4 | 82.9 | 85.4 | 87.8 | 88.9 | 90.1 |
| 32       | 1.957 | 83.377 | 0.045 | 75.4       | 76.9 | 78.2 | 80.8 | 83.4 | 85.9 | 88.3 | 89.4 | 90.7 |
| 33       | 1.957 | 83.849 | 0.046 | 75.8       | 77.3 | 78.6 | 81.3 | 83.8 | 86.4 | 88.8 | 89.9 | 91.2 |
| 34       | 1.957 | 84.328 | 0.046 | 76.2       | 77.7 | 79.0 | 81.7 | 84.3 | 86.9 | 89.3 | 90.5 | 91.7 |
| 35       | 1.957 | 84.819 | 0.046 | 76.7       | 78.2 | 79.5 | 82.2 | 84.8 | 87.4 | 89.9 | 91.0 | 92.3 |
| 36       | 1.957 | 85.323 | 0.046 | 77.1       | 78.6 | 79.9 | 82.7 | 85.3 | 87.9 | 90.4 | 91.6 | 92.9 |



**SUPPLEMENTAL TABLE 6** Head Circumference (Centimeters) for Age for Girls with DS, Aged Birth to 36 Months

| Age (mo) | L     | M      | S     | Percentile |      |      |      |      |      |      |      |      |
|----------|-------|--------|-------|------------|------|------|------|------|------|------|------|------|
|          |       |        |       | 2nd        | 5th  | 10th | 25th | 50th | 75th | 90th | 95th | 98th |
| 1        | 3.049 | 36.352 | 0.030 | 34.0       | 34.5 | 34.8 | 35.6 | 36.4 | 37.1 | 37.8 | 38.1 | 38.4 |
| 2        | 3.049 | 37.148 | 0.030 | 34.8       | 35.2 | 35.6 | 36.4 | 37.1 | 37.9 | 38.6 | 38.9 | 39.3 |
| 3        | 3.049 | 37.937 | 0.030 | 35.5       | 36.0 | 36.4 | 37.2 | 37.9 | 38.7 | 39.4 | 39.7 | 40.1 |
| 4        | 3.049 | 38.705 | 0.030 | 36.2       | 36.7 | 37.1 | 37.9 | 38.7 | 39.5 | 40.2 | 40.5 | 40.9 |
| 5        | 3.049 | 39.436 | 0.030 | 36.9       | 37.4 | 37.8 | 38.6 | 39.4 | 40.2 | 41.0 | 41.3 | 41.7 |
| 6        | 3.049 | 40.119 | 0.030 | 37.5       | 38.0 | 38.4 | 39.3 | 40.1 | 40.9 | 41.7 | 42.0 | 42.4 |
| 7        | 3.049 | 40.737 | 0.030 | 38.1       | 38.6 | 39.0 | 39.9 | 40.7 | 41.5 | 42.3 | 42.6 | 43.0 |
| 8        | 3.049 | 41.282 | 0.030 | 38.6       | 39.1 | 39.6 | 40.4 | 41.3 | 42.1 | 42.9 | 43.2 | 43.6 |
| 9        | 3.049 | 41.758 | 0.030 | 39.1       | 39.6 | 40.0 | 40.9 | 41.8 | 42.6 | 43.4 | 43.7 | 44.1 |
| 10       | 3.049 | 42.170 | 0.030 | 39.5       | 40.0 | 40.4 | 41.3 | 42.2 | 43.0 | 43.8 | 44.1 | 44.6 |
| 11       | 3.049 | 42.526 | 0.030 | 39.8       | 40.3 | 40.7 | 41.7 | 42.5 | 43.4 | 44.2 | 44.5 | 44.9 |
| 12       | 3.049 | 42.837 | 0.030 | 40.1       | 40.6 | 41.0 | 42.0 | 42.8 | 43.7 | 44.5 | 44.8 | 45.3 |
| 13       | 3.049 | 43.111 | 0.030 | 40.3       | 40.9 | 41.3 | 42.2 | 43.1 | 44.0 | 44.8 | 45.1 | 45.6 |
| 14       | 3.049 | 43.352 | 0.030 | 40.6       | 41.1 | 41.5 | 42.5 | 43.4 | 44.2 | 45.0 | 45.4 | 45.8 |
| 15       | 3.049 | 43.570 | 0.030 | 40.8       | 41.3 | 41.7 | 42.7 | 43.6 | 44.4 | 45.2 | 45.6 | 46.0 |
| 16       | 3.049 | 43.767 | 0.030 | 41.0       | 41.5 | 41.9 | 42.9 | 43.8 | 44.6 | 45.5 | 45.8 | 46.2 |
| 17       | 3.049 | 43.949 | 0.030 | 41.1       | 41.7 | 42.1 | 43.1 | 43.9 | 44.8 | 45.6 | 46.0 | 46.4 |
| 18       | 3.049 | 44.119 | 0.030 | 41.3       | 41.8 | 42.3 | 43.2 | 44.1 | 45.0 | 45.8 | 46.2 | 46.6 |
| 19       | 3.049 | 44.279 | 0.030 | 41.4       | 42.0 | 42.4 | 43.4 | 44.3 | 45.1 | 46.0 | 46.4 | 46.8 |
| 20       | 3.049 | 44.428 | 0.030 | 41.6       | 42.1 | 42.6 | 43.5 | 44.4 | 45.3 | 46.1 | 46.5 | 46.9 |
| 21       | 3.049 | 44.571 | 0.030 | 41.7       | 42.3 | 42.7 | 43.7 | 44.6 | 45.4 | 46.3 | 46.7 | 47.1 |
| 22       | 3.049 | 44.710 | 0.030 | 41.8       | 42.4 | 42.8 | 43.8 | 44.7 | 45.6 | 46.4 | 46.8 | 47.2 |
| 23       | 3.049 | 44.847 | 0.030 | 42.0       | 42.5 | 43.0 | 43.9 | 44.8 | 45.7 | 46.6 | 47.0 | 47.4 |
| 24       | 3.049 | 44.983 | 0.030 | 42.1       | 42.6 | 43.1 | 44.1 | 45.0 | 45.9 | 46.7 | 47.1 | 47.5 |
| 25       | 3.049 | 45.114 | 0.030 | 42.2       | 42.8 | 43.2 | 44.2 | 45.1 | 46.0 | 46.9 | 47.2 | 47.7 |
| 26       | 3.049 | 45.237 | 0.030 | 42.3       | 42.9 | 43.3 | 44.3 | 45.2 | 46.1 | 47.0 | 47.4 | 47.8 |
| 27       | 3.049 | 45.347 | 0.030 | 42.4       | 43.0 | 43.5 | 44.4 | 45.3 | 46.2 | 47.1 | 47.5 | 47.9 |
| 28       | 3.049 | 45.441 | 0.030 | 42.5       | 43.1 | 43.5 | 44.5 | 45.4 | 46.3 | 47.2 | 47.6 | 48.0 |
| 29       | 3.049 | 45.521 | 0.030 | 42.6       | 43.2 | 43.6 | 44.6 | 45.5 | 46.4 | 47.3 | 47.7 | 48.1 |
| 30       | 3.049 | 45.587 | 0.030 | 42.7       | 43.2 | 43.7 | 44.7 | 45.6 | 46.5 | 47.3 | 47.7 | 48.2 |
| 31       | 3.049 | 45.642 | 0.030 | 42.7       | 43.3 | 43.7 | 44.7 | 45.6 | 46.5 | 47.4 | 47.8 | 48.2 |
| 32       | 3.049 | 45.683 | 0.030 | 42.8       | 43.3 | 43.8 | 44.7 | 45.7 | 46.6 | 47.4 | 47.8 | 48.3 |
| 33       | 3.049 | 45.715 | 0.030 | 42.8       | 43.3 | 43.8 | 44.8 | 45.7 | 46.6 | 47.5 | 47.9 | 48.3 |
| 34       | 3.049 | 45.743 | 0.030 | 42.8       | 43.4 | 43.8 | 44.8 | 45.7 | 46.6 | 47.5 | 47.9 | 48.3 |
| 35       | 3.049 | 45.772 | 0.030 | 42.8       | 43.4 | 43.9 | 44.8 | 45.8 | 46.7 | 47.5 | 47.9 | 48.4 |
| 36       | 3.049 | 45.795 | 0.030 | 42.9       | 43.4 | 43.9 | 44.9 | 45.8 | 46.7 | 47.6 | 47.9 | 48.4 |

**SUPPLEMENTAL TABLE 7** Weight (Kilograms) for Length (Centimeters) for Girls With DS, Aged Birth to 36 Months

| Length (cm) | L      | M      | S     | Percentile |      |      |      |      |      |      |      |      |
|-------------|--------|--------|-------|------------|------|------|------|------|------|------|------|------|
|             |        |        |       | 2nd        | 5th  | 10th | 25th | 50th | 75th | 90th | 95th | 98th |
| 52          | -1.268 | 3.631  | 0.084 | 3.1        | 3.2  | 3.3  | 3.4  | 3.6  | 3.8  | 4.1  | 4.2  | 4.4  |
| 53          | -1.268 | 3.850  | 0.084 | 3.3        | 3.4  | 3.5  | 3.6  | 3.8  | 4.1  | 4.3  | 4.5  | 4.7  |
| 54          | -1.268 | 4.092  | 0.084 | 3.5        | 3.6  | 3.7  | 3.9  | 4.1  | 4.3  | 4.6  | 4.8  | 4.9  |
| 55          | -1.268 | 4.335  | 0.084 | 3.7        | 3.8  | 3.9  | 4.1  | 4.3  | 4.6  | 4.9  | 5.0  | 5.2  |
| 56          | -1.268 | 4.579  | 0.084 | 3.9        | 4.0  | 4.1  | 4.3  | 4.6  | 4.9  | 5.2  | 5.3  | 5.5  |
| 57          | -1.268 | 4.823  | 0.084 | 4.1        | 4.2  | 4.3  | 4.6  | 4.8  | 5.1  | 5.4  | 5.6  | 5.8  |
| 58          | -1.268 | 5.069  | 0.084 | 4.4        | 4.5  | 4.6  | 4.8  | 5.1  | 5.4  | 5.7  | 5.9  | 6.1  |
| 59          | -1.268 | 5.316  | 0.084 | 4.6        | 4.7  | 4.8  | 5.0  | 5.3  | 5.6  | 6.0  | 6.2  | 6.4  |
| 60          | -1.268 | 5.565  | 0.084 | 4.8        | 4.9  | 5.0  | 5.3  | 5.6  | 5.9  | 6.3  | 6.5  | 6.7  |
| 61          | -1.268 | 5.816  | 0.084 | 5.0        | 5.1  | 5.2  | 5.5  | 5.8  | 6.2  | 6.6  | 6.8  | 7.0  |
| 62          | -1.268 | 6.068  | 0.084 | 5.2        | 5.3  | 5.5  | 5.7  | 6.1  | 6.4  | 6.8  | 7.1  | 7.3  |
| 63          | -1.268 | 6.322  | 0.084 | 5.4        | 5.6  | 5.7  | 6.0  | 6.3  | 6.7  | 7.1  | 7.4  | 7.6  |
| 64          | -1.268 | 6.578  | 0.084 | 5.6        | 5.8  | 5.9  | 6.2  | 6.6  | 7.0  | 7.4  | 7.7  | 7.9  |
| 65          | -1.268 | 6.835  | 0.084 | 5.9        | 6.0  | 6.2  | 6.5  | 6.8  | 7.2  | 7.7  | 8.0  | 8.3  |
| 66          | -1.268 | 7.092  | 0.084 | 6.1        | 6.2  | 6.4  | 6.7  | 7.1  | 7.5  | 8.0  | 8.3  | 8.6  |
| 67          | -1.268 | 7.350  | 0.084 | 6.3        | 6.5  | 6.6  | 7.0  | 7.4  | 7.8  | 8.3  | 8.6  | 8.9  |
| 68          | -1.268 | 7.609  | 0.084 | 6.5        | 6.7  | 6.9  | 7.2  | 7.6  | 8.1  | 8.6  | 8.9  | 9.2  |
| 69          | -1.268 | 7.868  | 0.084 | 6.8        | 6.9  | 7.1  | 7.5  | 7.9  | 8.3  | 8.9  | 9.2  | 9.5  |
| 70          | -1.268 | 8.126  | 0.084 | 7.0        | 7.2  | 7.3  | 7.7  | 8.1  | 8.6  | 9.2  | 9.5  | 9.8  |
| 71          | -1.268 | 8.384  | 0.084 | 7.2        | 7.4  | 7.6  | 7.9  | 8.4  | 8.9  | 9.5  | 9.8  | 10.1 |
| 72          | -1.268 | 8.642  | 0.084 | 7.4        | 7.6  | 7.8  | 8.2  | 8.6  | 9.2  | 9.8  | 10.1 | 10.4 |
| 73          | -1.268 | 8.900  | 0.084 | 7.6        | 7.8  | 8.0  | 8.4  | 8.9  | 9.4  | 10.0 | 10.4 | 10.8 |
| 74          | -1.268 | 9.157  | 0.084 | 7.9        | 8.1  | 8.2  | 8.7  | 9.2  | 9.7  | 10.3 | 10.7 | 11.1 |
| 75          | -1.268 | 9.412  | 0.084 | 8.1        | 8.3  | 8.5  | 8.9  | 9.4  | 10.0 | 10.6 | 11.0 | 11.4 |
| 76          | -1.268 | 9.667  | 0.084 | 8.3        | 8.5  | 8.7  | 9.2  | 9.7  | 10.2 | 10.9 | 11.3 | 11.7 |
| 77          | -1.268 | 9.920  | 0.084 | 8.5        | 8.7  | 8.9  | 9.4  | 9.9  | 10.5 | 11.2 | 11.5 | 12.0 |
| 78          | -1.268 | 10.173 | 0.084 | 8.7        | 9.0  | 9.2  | 9.6  | 10.2 | 10.8 | 11.5 | 11.8 | 12.3 |
| 79          | -1.268 | 10.423 | 0.084 | 8.9        | 9.2  | 9.4  | 9.9  | 10.4 | 11.0 | 11.8 | 12.1 | 12.6 |
| 80          | -1.268 | 10.673 | 0.084 | 9.2        | 9.4  | 9.6  | 10.1 | 10.7 | 11.3 | 12.0 | 12.4 | 12.9 |
| 81          | -1.268 | 10.922 | 0.084 | 9.4        | 9.6  | 9.8  | 10.3 | 10.9 | 11.6 | 12.3 | 12.7 | 13.2 |
| 82          | -1.268 | 11.170 | 0.084 | 9.6        | 9.8  | 10.1 | 10.6 | 11.2 | 11.8 | 12.6 | 13.0 | 13.5 |
| 83          | -1.268 | 11.417 | 0.084 | 9.8        | 10.1 | 10.3 | 10.8 | 11.4 | 12.1 | 12.9 | 13.3 | 13.8 |
| 84          | -1.268 | 11.664 | 0.084 | 10.0       | 10.3 | 10.5 | 11.0 | 11.7 | 12.4 | 13.2 | 13.6 | 14.1 |
| 85          | -1.268 | 11.911 | 0.084 | 10.2       | 10.5 | 10.7 | 11.3 | 11.9 | 12.6 | 13.4 | 13.9 | 14.4 |
| 86          | -1.268 | 12.158 | 0.084 | 10.4       | 10.7 | 10.9 | 11.5 | 12.2 | 12.9 | 13.7 | 14.2 | 14.7 |
| 87          | -1.268 | 12.405 | 0.084 | 10.7       | 10.9 | 11.2 | 11.8 | 12.4 | 13.1 | 14.0 | 14.4 | 15.0 |
| 88          | -1.268 | 12.651 | 0.084 | 10.9       | 11.1 | 11.4 | 12.0 | 12.7 | 13.4 | 14.3 | 14.7 | 15.3 |
| 89          | -1.268 | 12.898 | 0.084 | 11.1       | 11.4 | 11.6 | 12.2 | 12.9 | 13.7 | 14.6 | 15.0 | 15.6 |
| 90          | -1.268 | 13.137 | 0.084 | 11.3       | 11.6 | 11.8 | 12.4 | 13.1 | 13.9 | 14.8 | 15.3 | 15.9 |

**SUPPLEMENTAL TABLE 8** Weight (Kilograms) for Age for Boys With DS, Aged Birth to 36 Months

| Age (mo) | L     | M      | S     | Percentile |      |      |      |      |      |      |      |      |
|----------|-------|--------|-------|------------|------|------|------|------|------|------|------|------|
|          |       |        |       | 2nd        | 5th  | 10th | 25th | 50th | 75th | 90th | 95th | 98th |
| 0        | 0.576 | 3.177  | 0.151 | 2.3        | 2.4  | 2.6  | 2.9  | 3.2  | 3.5  | 3.8  | 4.0  | 4.2  |
| 1        | 0.559 | 3.867  | 0.148 | 2.8        | 3.0  | 3.1  | 3.5  | 3.9  | 4.3  | 4.7  | 4.9  | 5.1  |
| 2        | 0.542 | 4.562  | 0.146 | 3.3        | 3.5  | 3.7  | 4.1  | 4.6  | 5.0  | 5.5  | 5.7  | 6.0  |
| 3        | 0.526 | 5.247  | 0.144 | 3.8        | 4.1  | 4.3  | 4.8  | 5.2  | 5.8  | 6.3  | 6.6  | 6.9  |
| 4        | 0.511 | 5.903  | 0.141 | 4.3        | 4.6  | 4.8  | 5.4  | 5.9  | 6.5  | 7.1  | 7.4  | 7.7  |
| 5        | 0.496 | 6.504  | 0.139 | 4.8        | 5.1  | 5.4  | 5.9  | 6.5  | 7.1  | 7.8  | 8.1  | 8.4  |
| 6        | 0.482 | 7.036  | 0.138 | 5.2        | 5.5  | 5.8  | 6.4  | 7.0  | 7.7  | 8.4  | 8.7  | 9.1  |
| 7        | 0.469 | 7.500  | 0.136 | 5.6        | 5.9  | 6.2  | 6.8  | 7.5  | 8.2  | 8.9  | 9.3  | 9.7  |
| 8        | 0.457 | 7.902  | 0.135 | 5.9        | 6.3  | 6.6  | 7.2  | 7.9  | 8.6  | 9.4  | 9.8  | 10.2 |
| 9        | 0.446 | 8.251  | 0.134 | 6.2        | 6.5  | 6.9  | 7.5  | 8.3  | 9.0  | 9.8  | 10.2 | 10.6 |
| 10       | 0.436 | 8.559  | 0.133 | 6.5        | 6.8  | 7.1  | 7.8  | 8.6  | 9.3  | 10.1 | 10.5 | 11.0 |
| 11       | 0.427 | 8.834  | 0.132 | 6.7        | 7.0  | 7.4  | 8.1  | 8.8  | 9.6  | 10.5 | 10.9 | 11.3 |
| 12       | 0.419 | 9.084  | 0.131 | 6.9        | 7.2  | 7.6  | 8.3  | 9.1  | 9.9  | 10.8 | 11.2 | 11.7 |
| 13       | 0.412 | 9.315  | 0.131 | 7.1        | 7.4  | 7.8  | 8.5  | 9.3  | 10.1 | 11.0 | 11.4 | 11.9 |
| 14       | 0.405 | 9.531  | 0.130 | 7.2        | 7.6  | 8.0  | 8.7  | 9.5  | 10.4 | 11.3 | 11.7 | 12.2 |
| 15       | 0.399 | 9.735  | 0.130 | 7.4        | 7.8  | 8.1  | 8.9  | 9.7  | 10.6 | 11.5 | 11.9 | 12.5 |
| 16       | 0.393 | 9.928  | 0.130 | 7.6        | 7.9  | 8.3  | 9.1  | 9.9  | 10.8 | 11.7 | 12.2 | 12.7 |
| 17       | 0.388 | 10.112 | 0.129 | 7.7        | 8.1  | 8.5  | 9.3  | 10.1 | 11.0 | 11.9 | 12.4 | 12.9 |
| 18       | 0.383 | 10.288 | 0.129 | 7.8        | 8.2  | 8.6  | 9.4  | 10.3 | 11.2 | 12.2 | 12.6 | 13.2 |
| 19       | 0.378 | 10.457 | 0.129 | 8.0        | 8.4  | 8.8  | 9.6  | 10.5 | 11.4 | 12.4 | 12.8 | 13.4 |
| 20       | 0.373 | 10.620 | 0.129 | 8.1        | 8.5  | 8.9  | 9.7  | 10.6 | 11.6 | 12.5 | 13.0 | 13.6 |
| 21       | 0.369 | 10.777 | 0.129 | 8.2        | 8.6  | 9.0  | 9.9  | 10.8 | 11.7 | 12.7 | 13.2 | 13.8 |
| 22       | 0.365 | 10.930 | 0.129 | 8.3        | 8.8  | 9.2  | 10.0 | 10.9 | 11.9 | 12.9 | 13.4 | 14.0 |
| 23       | 0.361 | 11.080 | 0.129 | 8.5        | 8.9  | 9.3  | 10.2 | 11.1 | 12.1 | 13.1 | 13.6 | 14.2 |
| 24       | 0.357 | 11.227 | 0.129 | 8.6        | 9.0  | 9.4  | 10.3 | 11.2 | 12.2 | 13.3 | 13.8 | 14.4 |
| 25       | 0.353 | 11.371 | 0.129 | 8.7        | 9.1  | 9.5  | 10.4 | 11.4 | 12.4 | 13.4 | 14.0 | 14.6 |
| 26       | 0.349 | 11.513 | 0.129 | 8.8        | 9.2  | 9.6  | 10.6 | 11.5 | 12.5 | 13.6 | 14.1 | 14.7 |
| 27       | 0.346 | 11.652 | 0.129 | 8.9        | 9.3  | 9.8  | 10.7 | 11.7 | 12.7 | 13.8 | 14.3 | 14.9 |
| 28       | 0.342 | 11.789 | 0.129 | 9.0        | 9.5  | 9.9  | 10.8 | 11.8 | 12.8 | 13.9 | 14.5 | 15.1 |
| 29       | 0.339 | 11.922 | 0.129 | 9.1        | 9.6  | 10.0 | 10.9 | 11.9 | 13.0 | 14.1 | 14.6 | 15.3 |
| 30       | 0.335 | 12.053 | 0.129 | 9.2        | 9.7  | 10.1 | 11.0 | 12.1 | 13.1 | 14.3 | 14.8 | 15.4 |
| 31       | 0.332 | 12.182 | 0.129 | 9.3        | 9.8  | 10.2 | 11.2 | 12.2 | 13.3 | 14.4 | 15.0 | 15.6 |
| 32       | 0.328 | 12.308 | 0.130 | 9.4        | 9.9  | 10.3 | 11.3 | 12.3 | 13.4 | 14.6 | 15.1 | 15.8 |
| 33       | 0.325 | 12.432 | 0.130 | 9.5        | 10.0 | 10.4 | 11.4 | 12.4 | 13.5 | 14.7 | 15.3 | 15.9 |
| 34       | 0.322 | 12.554 | 0.130 | 9.6        | 10.1 | 10.5 | 11.5 | 12.6 | 13.7 | 14.9 | 15.4 | 16.1 |
| 35       | 0.319 | 12.674 | 0.130 | 9.7        | 10.2 | 10.6 | 11.6 | 12.7 | 13.8 | 15.0 | 15.6 | 16.3 |
| 36       | 0.316 | 12.794 | 0.130 | 9.7        | 10.2 | 10.7 | 11.7 | 12.8 | 13.9 | 15.2 | 15.7 | 16.4 |

**SUPPLEMENTAL TABLE 9** Length (Centimeters) for Age for Boys With DS, Ages Birth to 36 Months

| Age (mo) | L     | M      | S     | Percentile |      |      |      |      |      |      |      |      |
|----------|-------|--------|-------|------------|------|------|------|------|------|------|------|------|
|          |       |        |       | 2nd        | 5th  | 10th | 25th | 50th | 75th | 90th | 95th | 98th |
| 1        | 0.453 | 52.632 | 0.039 | 48.6       | 49.3 | 49.9 | 51.3 | 52.6 | 54.0 | 55.4 | 56.1 | 56.9 |
| 2        | 0.453 | 55.065 | 0.040 | 50.8       | 51.5 | 52.2 | 53.6 | 55.1 | 56.5 | 58.0 | 58.7 | 59.5 |
| 3        | 0.453 | 57.450 | 0.040 | 53.0       | 53.8 | 54.4 | 55.9 | 57.4 | 59.0 | 60.5 | 61.3 | 62.1 |
| 4        | 0.453 | 59.745 | 0.040 | 55.1       | 55.9 | 56.6 | 58.2 | 59.7 | 61.4 | 63.0 | 63.8 | 64.6 |
| 5        | 0.453 | 61.904 | 0.040 | 57.0       | 57.9 | 58.6 | 60.2 | 61.9 | 63.6 | 65.3 | 66.1 | 67.0 |
| 6        | 0.453 | 63.894 | 0.041 | 58.8       | 59.7 | 60.5 | 62.2 | 63.9 | 65.6 | 67.4 | 68.2 | 69.2 |
| 7        | 0.453 | 65.702 | 0.041 | 60.4       | 61.4 | 62.2 | 63.9 | 65.7 | 67.5 | 69.3 | 70.2 | 71.2 |
| 8        | 0.453 | 67.329 | 0.041 | 61.9       | 62.8 | 63.7 | 65.5 | 67.3 | 69.2 | 71.1 | 72.0 | 73.0 |
| 9        | 0.453 | 68.783 | 0.041 | 63.2       | 64.2 | 65.0 | 66.9 | 68.8 | 70.7 | 72.6 | 73.6 | 74.6 |
| 10       | 0.453 | 70.090 | 0.042 | 64.4       | 65.4 | 66.2 | 68.2 | 70.1 | 72.1 | 74.0 | 75.0 | 76.1 |
| 11       | 0.453 | 71.276 | 0.042 | 65.4       | 66.4 | 67.3 | 69.3 | 71.3 | 73.3 | 75.3 | 76.3 | 77.4 |
| 12       | 0.453 | 72.364 | 0.042 | 66.4       | 67.4 | 68.4 | 70.3 | 72.4 | 74.4 | 76.5 | 77.5 | 78.6 |
| 13       | 0.453 | 73.375 | 0.042 | 67.3       | 68.4 | 69.3 | 71.3 | 73.4 | 75.5 | 77.6 | 78.6 | 79.7 |
| 14       | 0.453 | 74.328 | 0.043 | 68.1       | 69.2 | 70.2 | 72.2 | 74.3 | 76.5 | 78.6 | 79.6 | 80.8 |
| 15       | 0.453 | 75.231 | 0.043 | 68.9       | 70.0 | 71.0 | 73.1 | 75.2 | 77.4 | 79.6 | 80.6 | 81.8 |
| 16       | 0.453 | 76.086 | 0.043 | 69.7       | 70.8 | 71.8 | 73.9 | 76.1 | 78.3 | 80.5 | 81.6 | 82.8 |
| 17       | 0.453 | 76.897 | 0.043 | 70.4       | 71.5 | 72.5 | 74.7 | 76.9 | 79.1 | 81.4 | 82.5 | 83.7 |
| 18       | 0.453 | 77.664 | 0.043 | 71.1       | 72.2 | 73.2 | 75.4 | 77.7 | 79.9 | 82.2 | 83.3 | 84.6 |
| 19       | 0.453 | 78.391 | 0.044 | 71.7       | 72.9 | 73.9 | 76.1 | 78.4 | 80.7 | 83.0 | 84.1 | 85.4 |
| 20       | 0.453 | 79.079 | 0.044 | 72.3       | 73.5 | 74.5 | 76.8 | 79.1 | 81.4 | 83.8 | 84.9 | 86.2 |
| 21       | 0.453 | 79.730 | 0.044 | 72.9       | 74.1 | 75.1 | 77.4 | 79.7 | 82.1 | 84.5 | 85.6 | 86.9 |
| 22       | 0.453 | 80.350 | 0.044 | 73.4       | 74.6 | 75.7 | 78.0 | 80.3 | 82.7 | 85.1 | 86.3 | 87.6 |
| 23       | 0.453 | 80.942 | 0.044 | 74.0       | 75.2 | 76.2 | 78.6 | 80.9 | 83.3 | 85.8 | 86.9 | 88.3 |
| 24       | 0.453 | 81.511 | 0.044 | 74.5       | 75.7 | 76.8 | 79.1 | 81.5 | 83.9 | 86.4 | 87.6 | 88.9 |
| 25       | 0.453 | 82.057 | 0.044 | 74.9       | 76.2 | 77.3 | 79.6 | 82.1 | 84.5 | 87.0 | 88.2 | 89.5 |
| 26       | 0.453 | 82.583 | 0.045 | 75.4       | 76.6 | 77.8 | 80.1 | 82.6 | 85.1 | 87.6 | 88.8 | 90.1 |
| 27       | 0.453 | 83.090 | 0.045 | 75.8       | 77.1 | 78.2 | 80.6 | 83.1 | 85.6 | 88.1 | 89.3 | 90.7 |
| 28       | 0.453 | 83.580 | 0.045 | 76.3       | 77.5 | 78.7 | 81.1 | 83.6 | 86.1 | 88.7 | 89.9 | 91.3 |
| 29       | 0.453 | 84.056 | 0.045 | 76.7       | 78.0 | 79.1 | 81.6 | 84.1 | 86.6 | 89.2 | 90.4 | 91.8 |
| 30       | 0.453 | 84.522 | 0.045 | 77.1       | 78.4 | 79.5 | 82.0 | 84.5 | 87.1 | 89.7 | 90.9 | 92.3 |
| 31       | 0.453 | 84.979 | 0.045 | 77.5       | 78.8 | 79.9 | 82.4 | 85.0 | 87.6 | 90.2 | 91.4 | 92.8 |
| 32       | 0.453 | 85.431 | 0.045 | 77.9       | 79.2 | 80.4 | 82.9 | 85.4 | 88.0 | 90.7 | 91.9 | 93.4 |
| 33       | 0.453 | 85.880 | 0.045 | 78.3       | 79.6 | 80.8 | 83.3 | 85.9 | 88.5 | 91.2 | 92.4 | 93.9 |
| 34       | 0.453 | 86.328 | 0.045 | 78.7       | 80.0 | 81.2 | 83.7 | 86.3 | 89.0 | 91.6 | 92.9 | 94.4 |
| 35       | 0.453 | 86.774 | 0.046 | 79.1       | 80.4 | 81.6 | 84.2 | 86.8 | 89.4 | 92.1 | 93.4 | 94.9 |
| 36       | 0.453 | 87.222 | 0.046 | 79.5       | 80.8 | 82.0 | 84.6 | 87.2 | 89.9 | 92.6 | 93.9 | 95.4 |

**SUPPLEMENTAL TABLE 10** Head Circumference (Centimeters) for Age for Boys With DS, Aged Birth to 36 Months

| Age (mo) | L     | M      | S     | Percentile |      |      |      |      |      |      |      |      |
|----------|-------|--------|-------|------------|------|------|------|------|------|------|------|------|
|          |       |        |       | 2nd        | 5th  | 10th | 25th | 50th | 75th | 90th | 95th | 98th |
| 1        | 3.861 | 35.904 | 0.027 | 33.8       | 34.2 | 34.6 | 35.2 | 35.9 | 36.5 | 37.1 | 37.4 | 37.7 |
| 2        | 3.861 | 37.374 | 0.027 | 35.2       | 35.6 | 36.0 | 36.7 | 37.4 | 38.0 | 38.6 | 38.9 | 39.2 |
| 3        | 3.861 | 38.776 | 0.027 | 36.5       | 37.0 | 37.3 | 38.1 | 38.8 | 39.4 | 40.1 | 40.4 | 40.7 |
| 4        | 3.861 | 40.036 | 0.027 | 37.7       | 38.2 | 38.5 | 39.3 | 40.0 | 40.7 | 41.4 | 41.7 | 42.0 |
| 5        | 3.861 | 41.058 | 0.027 | 38.7       | 39.1 | 39.5 | 40.3 | 41.1 | 41.8 | 42.4 | 42.8 | 43.1 |
| 6        | 3.861 | 41.858 | 0.027 | 39.4       | 39.9 | 40.3 | 41.1 | 41.9 | 42.6 | 43.3 | 43.6 | 43.9 |
| 7        | 3.861 | 42.465 | 0.027 | 40.0       | 40.5 | 40.9 | 41.7 | 42.5 | 43.2 | 43.9 | 44.2 | 44.6 |
| 8        | 3.861 | 42.933 | 0.027 | 40.4       | 40.9 | 41.3 | 42.2 | 42.9 | 43.7 | 44.4 | 44.7 | 45.1 |
| 9        | 3.861 | 43.317 | 0.027 | 40.8       | 41.3 | 41.7 | 42.5 | 43.3 | 44.1 | 44.8 | 45.1 | 45.5 |
| 10       | 3.861 | 43.645 | 0.027 | 41.1       | 41.6 | 42.0 | 42.8 | 43.6 | 44.4 | 45.1 | 45.4 | 45.8 |
| 11       | 3.861 | 43.924 | 0.027 | 41.4       | 41.9 | 42.3 | 43.1 | 43.9 | 44.7 | 45.4 | 45.7 | 46.1 |
| 12       | 3.861 | 44.169 | 0.027 | 41.6       | 42.1 | 42.5 | 43.4 | 44.2 | 44.9 | 45.7 | 46.0 | 46.4 |
| 13       | 3.861 | 44.386 | 0.027 | 41.8       | 42.3 | 42.7 | 43.6 | 44.4 | 45.2 | 45.9 | 46.2 | 46.6 |
| 14       | 3.861 | 44.578 | 0.027 | 42.0       | 42.5 | 42.9 | 43.8 | 44.6 | 45.4 | 46.1 | 46.4 | 46.8 |
| 15       | 3.861 | 44.751 | 0.027 | 42.2       | 42.7 | 43.1 | 43.9 | 44.8 | 45.5 | 46.3 | 46.6 | 47.0 |
| 16       | 3.861 | 44.907 | 0.027 | 42.3       | 42.8 | 43.2 | 44.1 | 44.9 | 45.7 | 46.4 | 46.8 | 47.1 |
| 17       | 3.861 | 45.048 | 0.027 | 42.4       | 42.9 | 43.4 | 44.2 | 45.0 | 45.8 | 46.6 | 46.9 | 47.3 |
| 18       | 3.861 | 45.178 | 0.027 | 42.6       | 43.1 | 43.5 | 44.4 | 45.2 | 46.0 | 46.7 | 47.0 | 47.4 |
| 19       | 3.861 | 45.298 | 0.027 | 42.7       | 43.2 | 43.6 | 44.5 | 45.3 | 46.1 | 46.8 | 47.2 | 47.5 |
| 20       | 3.861 | 45.409 | 0.027 | 42.8       | 43.3 | 43.7 | 44.6 | 45.4 | 46.2 | 46.9 | 47.3 | 47.7 |
| 21       | 3.861 | 45.511 | 0.027 | 42.9       | 43.4 | 43.8 | 44.7 | 45.5 | 46.3 | 47.1 | 47.4 | 47.8 |
| 22       | 3.861 | 45.611 | 0.027 | 43.0       | 43.5 | 43.9 | 44.8 | 45.6 | 46.4 | 47.2 | 47.5 | 47.9 |
| 23       | 3.861 | 45.715 | 0.027 | 43.1       | 43.6 | 44.0 | 44.9 | 45.7 | 46.5 | 47.3 | 47.6 | 48.0 |
| 24       | 3.861 | 45.826 | 0.027 | 43.2       | 43.7 | 44.1 | 45.0 | 45.8 | 46.6 | 47.4 | 47.7 | 48.1 |
| 25       | 3.861 | 45.941 | 0.027 | 43.3       | 43.8 | 44.2 | 45.1 | 45.9 | 46.7 | 47.5 | 47.8 | 48.2 |
| 26       | 3.861 | 46.055 | 0.027 | 43.4       | 43.9 | 44.3 | 45.2 | 46.1 | 46.9 | 47.6 | 48.0 | 48.3 |
| 27       | 3.861 | 46.159 | 0.027 | 43.5       | 44.0 | 44.4 | 45.3 | 46.2 | 47.0 | 47.7 | 48.1 | 48.5 |
| 28       | 3.861 | 46.250 | 0.027 | 43.6       | 44.1 | 44.5 | 45.4 | 46.3 | 47.1 | 47.8 | 48.2 | 48.5 |
| 29       | 3.861 | 46.333 | 0.027 | 43.6       | 44.2 | 44.6 | 45.5 | 46.3 | 47.1 | 47.9 | 48.2 | 48.6 |
| 30       | 3.861 | 46.410 | 0.027 | 43.7       | 44.2 | 44.7 | 45.6 | 46.4 | 47.2 | 48.0 | 48.3 | 48.7 |
| 31       | 3.861 | 46.483 | 0.027 | 43.8       | 44.3 | 44.7 | 45.6 | 46.5 | 47.3 | 48.1 | 48.4 | 48.8 |
| 32       | 3.861 | 46.554 | 0.027 | 43.9       | 44.4 | 44.8 | 45.7 | 46.6 | 47.4 | 48.1 | 48.5 | 48.9 |
| 33       | 3.861 | 46.623 | 0.027 | 43.9       | 44.4 | 44.9 | 45.8 | 46.6 | 47.4 | 48.2 | 48.5 | 48.9 |
| 34       | 3.861 | 46.689 | 0.027 | 44.0       | 44.5 | 44.9 | 45.8 | 46.7 | 47.5 | 48.3 | 48.6 | 49.0 |
| 35       | 3.861 | 46.753 | 0.027 | 44.0       | 44.6 | 45.0 | 45.9 | 46.8 | 47.6 | 48.3 | 48.7 | 49.1 |
| 36       | 3.861 | 46.813 | 0.027 | 44.1       | 44.6 | 45.1 | 46.0 | 46.8 | 47.6 | 48.4 | 48.7 | 49.1 |

**SUPPLEMENTAL TABLE 11** Weight (Kilograms) for Length (Centimeters) for Boys With DS, Aged Birth to 36 Months

| Length (cm) | L     | M      | S     | Percentile |      |      |      |      |      |      |      |      |
|-------------|-------|--------|-------|------------|------|------|------|------|------|------|------|------|
|             |       |        |       | 2nd        | 5th  | 10th | 25th | 50th | 75th | 90th | 95th | 98th |
| 49          | 0.353 | 2.967  | 0.094 | 2.4        | 2.5  | 2.6  | 2.8  | 3.0  | 3.2  | 3.4  | 3.4  | 3.6  |
| 50          | 0.353 | 3.231  | 0.094 | 2.7        | 2.8  | 2.8  | 3.0  | 3.2  | 3.4  | 3.7  | 3.8  | 3.9  |
| 51          | 0.353 | 3.495  | 0.094 | 2.9        | 3.0  | 3.1  | 3.3  | 3.5  | 3.7  | 4.0  | 4.1  | 4.2  |
| 52          | 0.353 | 3.759  | 0.094 | 3.1        | 3.2  | 3.3  | 3.5  | 3.8  | 4.0  | 4.2  | 4.4  | 4.5  |
| 53          | 0.353 | 4.023  | 0.094 | 3.3        | 3.4  | 3.5  | 3.8  | 4.0  | 4.3  | 4.5  | 4.7  | 4.8  |
| 54          | 0.353 | 4.287  | 0.094 | 3.5        | 3.7  | 3.8  | 4.0  | 4.3  | 4.6  | 4.8  | 5.0  | 5.1  |
| 55          | 0.353 | 4.551  | 0.094 | 3.7        | 3.9  | 4.0  | 4.3  | 4.6  | 4.8  | 5.1  | 5.3  | 5.5  |
| 56          | 0.353 | 4.816  | 0.094 | 4.0        | 4.1  | 4.2  | 4.5  | 4.8  | 5.1  | 5.4  | 5.6  | 5.8  |
| 57          | 0.353 | 5.080  | 0.094 | 4.2        | 4.3  | 4.5  | 4.8  | 5.1  | 5.4  | 5.7  | 5.9  | 6.1  |
| 58          | 0.353 | 5.345  | 0.094 | 4.4        | 4.6  | 4.7  | 5.0  | 5.3  | 5.7  | 6.0  | 6.2  | 6.4  |
| 59          | 0.353 | 5.610  | 0.094 | 4.6        | 4.8  | 4.9  | 5.3  | 5.6  | 6.0  | 6.3  | 6.5  | 6.7  |
| 60          | 0.353 | 5.876  | 0.094 | 4.8        | 5.0  | 5.2  | 5.5  | 5.9  | 6.3  | 6.6  | 6.8  | 7.0  |
| 61          | 0.353 | 6.141  | 0.094 | 5.1        | 5.2  | 5.4  | 5.8  | 6.1  | 6.5  | 6.9  | 7.1  | 7.4  |
| 62          | 0.353 | 6.406  | 0.094 | 5.3        | 5.5  | 5.6  | 6.0  | 6.4  | 6.8  | 7.2  | 7.4  | 7.7  |
| 63          | 0.353 | 6.670  | 0.094 | 5.5        | 5.7  | 5.9  | 6.3  | 6.7  | 7.1  | 7.5  | 7.8  | 8.0  |
| 64          | 0.353 | 6.933  | 0.094 | 5.7        | 5.9  | 6.1  | 6.5  | 6.9  | 7.4  | 7.8  | 8.1  | 8.3  |
| 65          | 0.353 | 7.195  | 0.094 | 5.9        | 6.1  | 6.3  | 6.8  | 7.2  | 7.7  | 8.1  | 8.4  | 8.6  |
| 66          | 0.353 | 7.455  | 0.094 | 6.1        | 6.4  | 6.6  | 7.0  | 7.5  | 7.9  | 8.4  | 8.7  | 8.9  |
| 67          | 0.353 | 7.714  | 0.094 | 6.3        | 6.6  | 6.8  | 7.2  | 7.7  | 8.2  | 8.7  | 9.0  | 9.3  |
| 68          | 0.353 | 7.972  | 0.094 | 6.6        | 6.8  | 7.0  | 7.5  | 8.0  | 8.5  | 9.0  | 9.3  | 9.6  |
| 69          | 0.353 | 8.228  | 0.094 | 6.8        | 7.0  | 7.2  | 7.7  | 8.2  | 8.8  | 9.3  | 9.6  | 9.9  |
| 70          | 0.353 | 8.482  | 0.094 | 7.0        | 7.2  | 7.5  | 8.0  | 8.5  | 9.0  | 9.6  | 9.9  | 10.2 |
| 71          | 0.353 | 8.735  | 0.094 | 7.2        | 7.5  | 7.7  | 8.2  | 8.7  | 9.3  | 9.9  | 10.2 | 10.5 |
| 72          | 0.353 | 8.987  | 0.094 | 7.4        | 7.7  | 7.9  | 8.4  | 9.0  | 9.6  | 10.2 | 10.4 | 10.8 |
| 73          | 0.353 | 9.239  | 0.094 | 7.6        | 7.9  | 8.1  | 8.7  | 9.2  | 9.8  | 10.4 | 10.7 | 11.1 |
| 74          | 0.353 | 9.490  | 0.094 | 7.8        | 8.1  | 8.3  | 8.9  | 9.5  | 10.1 | 10.7 | 11.0 | 11.4 |
| 75          | 0.353 | 9.740  | 0.094 | 8.0        | 8.3  | 8.6  | 9.1  | 9.7  | 10.4 | 11.0 | 11.3 | 11.7 |
| 76          | 0.353 | 9.991  | 0.094 | 8.2        | 8.5  | 8.8  | 9.4  | 10.0 | 10.6 | 11.3 | 11.6 | 12.0 |
| 77          | 0.353 | 10.243 | 0.094 | 8.4        | 8.7  | 9.0  | 9.6  | 10.2 | 10.9 | 11.6 | 11.9 | 12.3 |
| 78          | 0.353 | 10.496 | 0.094 | 8.6        | 9.0  | 9.2  | 9.9  | 10.5 | 11.2 | 11.9 | 12.2 | 12.6 |
| 79          | 0.353 | 10.749 | 0.094 | 8.8        | 9.2  | 9.5  | 10.1 | 10.7 | 11.4 | 12.2 | 12.5 | 12.9 |
| 80          | 0.353 | 11.003 | 0.094 | 9.1        | 9.4  | 9.7  | 10.3 | 11.0 | 11.7 | 12.4 | 12.8 | 13.2 |
| 81          | 0.353 | 11.257 | 0.094 | 9.3        | 9.6  | 9.9  | 10.6 | 11.3 | 12.0 | 12.7 | 13.1 | 13.5 |
| 82          | 0.353 | 11.513 | 0.094 | 9.5        | 9.8  | 10.1 | 10.8 | 11.5 | 12.2 | 13.0 | 13.4 | 13.8 |
| 83          | 0.353 | 11.769 | 0.094 | 9.7        | 10.0 | 10.4 | 11.0 | 11.8 | 12.5 | 13.3 | 13.7 | 14.1 |
| 84          | 0.353 | 12.025 | 0.094 | 9.9        | 10.3 | 10.6 | 11.3 | 12.0 | 12.8 | 13.6 | 14.0 | 14.4 |
| 85          | 0.353 | 12.282 | 0.094 | 10.1       | 10.5 | 10.8 | 11.5 | 12.3 | 13.1 | 13.9 | 14.3 | 14.7 |
| 86          | 0.353 | 12.539 | 0.094 | 10.3       | 10.7 | 11.0 | 11.8 | 12.5 | 13.3 | 14.2 | 14.6 | 15.0 |
| 87          | 0.353 | 12.796 | 0.094 | 10.5       | 10.9 | 11.3 | 12.0 | 12.8 | 13.6 | 14.5 | 14.9 | 15.4 |
| 88          | 0.353 | 13.053 | 0.094 | 10.7       | 11.1 | 11.5 | 12.3 | 13.1 | 13.9 | 14.8 | 15.2 | 15.7 |
| 89          | 0.353 | 13.310 | 0.094 | 11.0       | 11.4 | 11.7 | 12.5 | 13.3 | 14.2 | 15.0 | 15.5 | 16.0 |
| 90          | 0.353 | 13.568 | 0.094 | 11.2       | 11.6 | 11.9 | 12.7 | 13.6 | 14.4 | 15.3 | 15.8 | 16.3 |
| 91          | 0.353 | 13.825 | 0.094 | 11.4       | 11.8 | 12.2 | 13.0 | 13.8 | 14.7 | 15.6 | 16.1 | 16.6 |
| 92          | 0.353 | 14.082 | 0.094 | 11.6       | 12.0 | 12.4 | 13.2 | 14.1 | 15.0 | 15.9 | 16.4 | 16.9 |
| 93          | 0.353 | 14.339 | 0.094 | 11.8       | 12.2 | 12.6 | 13.5 | 14.3 | 15.3 | 16.2 | 16.7 | 17.2 |

**SUPPLEMENTAL TABLE 12** Weight (Kilogram) for Age for Girls With DS, Aged 2 to 20 Years

| Age (y) | L      | M      | S     | Percentile |      |      |      |      |      |      |      |      |
|---------|--------|--------|-------|------------|------|------|------|------|------|------|------|------|
|         |        |        |       | 2nd        | 5th  | 10th | 25th | 50th | 75th | 90th | 95th | 98th |
| 2.0     | -0.670 | 10.526 | 0.141 | 8.1        | 8.5  | 8.8  | 9.6  | 10.5 | 11.6 | 12.9 | 13.6 | 14.4 |
| 2.5     | -0.755 | 11.370 | 0.143 | 8.8        | 9.2  | 9.5  | 10.4 | 11.4 | 12.6 | 14.0 | 14.7 | 15.7 |
| 3.0     | -0.832 | 12.190 | 0.145 | 9.4        | 9.8  | 10.2 | 11.1 | 12.2 | 13.5 | 15.0 | 15.9 | 17.0 |
| 3.5     | -0.909 | 13.083 | 0.147 | 10.1       | 10.5 | 10.9 | 11.9 | 13.1 | 14.5 | 16.2 | 17.2 | 18.4 |
| 4.0     | -0.984 | 14.039 | 0.150 | 10.8       | 11.3 | 11.7 | 12.8 | 14.0 | 15.6 | 17.5 | 18.6 | 20.0 |
| 4.5     | -1.055 | 15.067 | 0.154 | 11.5       | 12.0 | 12.5 | 13.7 | 15.1 | 16.8 | 19.0 | 20.2 | 21.9 |
| 5.0     | -1.120 | 16.120 | 0.158 | 12.3       | 12.8 | 13.3 | 14.6 | 16.1 | 18.0 | 20.5 | 21.9 | 23.8 |
| 5.5     | -1.175 | 17.199 | 0.163 | 13.1       | 13.6 | 14.2 | 15.5 | 17.2 | 19.3 | 22.1 | 23.7 | 25.9 |
| 6.0     | -1.220 | 18.342 | 0.168 | 13.8       | 14.5 | 15.0 | 16.5 | 18.3 | 20.7 | 23.8 | 25.7 | 28.2 |
| 6.5     | -1.253 | 19.577 | 0.174 | 14.7       | 15.3 | 16.0 | 17.6 | 19.6 | 22.2 | 25.7 | 27.9 | 30.9 |
| 7.0     | -1.272 | 20.927 | 0.180 | 15.6       | 16.3 | 17.0 | 18.7 | 20.9 | 23.8 | 27.9 | 30.4 | 33.9 |
| 7.5     | -1.274 | 22.397 | 0.187 | 16.5       | 17.3 | 18.0 | 19.9 | 22.4 | 25.7 | 30.2 | 33.1 | 37.2 |
| 8.0     | -1.258 | 23.999 | 0.195 | 17.5       | 18.3 | 19.2 | 21.3 | 24.0 | 27.7 | 32.9 | 36.2 | 41.0 |
| 8.5     | -1.226 | 25.746 | 0.202 | 18.5       | 19.5 | 20.4 | 22.7 | 25.7 | 29.8 | 35.7 | 39.5 | 45.0 |
| 9.0     | -1.176 | 27.598 | 0.210 | 19.6       | 20.7 | 21.7 | 24.2 | 27.6 | 32.2 | 38.8 | 43.0 | 49.3 |
| 9.5     | -1.112 | 29.527 | 0.217 | 20.7       | 21.8 | 23.0 | 25.8 | 29.5 | 34.6 | 41.9 | 46.6 | 53.5 |
| 10.0    | -1.038 | 31.485 | 0.224 | 21.8       | 23.0 | 24.3 | 27.4 | 31.5 | 37.0 | 45.0 | 50.1 | 57.6 |
| 10.5    | -0.957 | 33.413 | 0.230 | 22.8       | 24.2 | 25.5 | 29.0 | 33.4 | 39.4 | 48.0 | 53.5 | 61.3 |
| 11.0    | -0.874 | 35.309 | 0.235 | 23.8       | 25.3 | 26.8 | 30.5 | 35.3 | 41.8 | 50.9 | 56.6 | 64.6 |
| 11.5    | -0.791 | 37.187 | 0.239 | 24.8       | 26.4 | 28.0 | 32.0 | 37.2 | 44.1 | 53.6 | 59.5 | 67.7 |
| 12.0    | -0.712 | 39.053 | 0.241 | 25.8       | 27.5 | 29.2 | 33.5 | 39.1 | 46.3 | 56.3 | 62.2 | 70.5 |
| 12.5    | -0.636 | 40.922 | 0.242 | 26.8       | 28.7 | 30.5 | 35.1 | 40.9 | 48.5 | 58.8 | 64.8 | 73.1 |
| 13.0    | -0.561 | 42.808 | 0.243 | 27.9       | 29.9 | 31.8 | 36.7 | 42.8 | 50.7 | 61.2 | 67.3 | 75.5 |
| 13.5    | -0.486 | 44.712 | 0.242 | 28.9       | 31.1 | 33.1 | 38.3 | 44.7 | 52.9 | 63.5 | 69.6 | 77.7 |
| 14.0    | -0.410 | 46.614 | 0.241 | 30.0       | 32.3 | 34.5 | 39.9 | 46.6 | 55.1 | 65.8 | 71.9 | 79.8 |
| 14.5    | -0.330 | 48.501 | 0.240 | 31.1       | 33.5 | 35.8 | 41.5 | 48.5 | 57.1 | 68.0 | 74.0 | 81.7 |
| 15.0    | -0.246 | 50.347 | 0.238 | 32.1       | 34.7 | 37.1 | 43.1 | 50.3 | 59.2 | 70.0 | 76.0 | 83.5 |
| 15.5    | -0.158 | 52.149 | 0.236 | 33.1       | 35.8 | 38.4 | 44.6 | 52.1 | 61.1 | 72.0 | 77.8 | 85.1 |
| 16.0    | -0.066 | 53.895 | 0.234 | 34.0       | 36.9 | 39.6 | 46.1 | 53.9 | 63.0 | 73.9 | 79.6 | 86.7 |
| 16.5    | 0.028  | 55.571 | 0.232 | 34.8       | 37.8 | 40.7 | 47.6 | 55.6 | 64.9 | 75.6 | 81.3 | 88.2 |
| 17.0    | 0.123  | 57.172 | 0.231 | 35.6       | 38.8 | 41.8 | 49.0 | 57.2 | 66.6 | 77.3 | 82.8 | 89.5 |
| 17.5    | 0.219  | 58.694 | 0.229 | 36.2       | 39.6 | 42.8 | 50.2 | 58.7 | 68.2 | 78.9 | 84.3 | 90.8 |
| 18.0    | 0.315  | 60.128 | 0.228 | 36.8       | 40.3 | 43.7 | 51.5 | 60.1 | 69.7 | 80.4 | 85.7 | 92.1 |
| 18.5    | 0.408  | 61.472 | 0.227 | 37.2       | 41.0 | 44.5 | 52.6 | 61.5 | 71.2 | 81.7 | 87.0 | 93.2 |
| 19.0    | 0.499  | 62.730 | 0.226 | 37.6       | 41.6 | 45.3 | 53.6 | 62.7 | 72.5 | 83.0 | 88.2 | 94.2 |
| 19.5    | 0.587  | 63.922 | 0.225 | 37.9       | 42.1 | 46.0 | 54.6 | 63.9 | 73.8 | 84.2 | 89.3 | 95.3 |
| 20.0    | 0.674  | 65.063 | 0.224 | 38.2       | 42.6 | 46.6 | 55.6 | 65.1 | 75.0 | 85.4 | 90.4 | 96.2 |



**SUPPLEMENTAL TABLE 13** Height (Centimeters) for Age for Girls With DS, Aged 2 to 20 Years

| Age (y) | L     | M       | S     | Percentile |       |       |       |       |       |       |       |       |
|---------|-------|---------|-------|------------|-------|-------|-------|-------|-------|-------|-------|-------|
|         |       |         |       | 2nd        | 5th   | 10th  | 25th  | 50th  | 75th  | 90th  | 95th  | 98th  |
| 2.0     | 1.957 | 79.361  | 0.044 | 72.0       | 73.4  | 74.6  | 77.0  | 79.4  | 81.7  | 83.9  | 84.9  | 86.1  |
| 2.5     | 1.957 | 82.438  | 0.045 | 74.6       | 76.1  | 77.3  | 79.9  | 82.4  | 84.9  | 87.3  | 88.4  | 89.6  |
| 3.0     | 1.957 | 85.323  | 0.046 | 77.1       | 78.6  | 79.9  | 82.7  | 85.3  | 87.9  | 90.4  | 91.6  | 92.9  |
| 3.5     | 1.957 | 88.601  | 0.047 | 79.9       | 81.5  | 82.9  | 85.8  | 88.6  | 91.3  | 94.0  | 95.2  | 96.6  |
| 4.0     | 1.957 | 92.089  | 0.048 | 82.9       | 84.6  | 86.0  | 89.1  | 92.1  | 95.0  | 97.8  | 99.1  | 100.5 |
| 4.5     | 1.957 | 95.505  | 0.048 | 85.8       | 87.6  | 89.1  | 92.4  | 95.5  | 98.5  | 101.5 | 102.8 | 104.4 |
| 5.0     | 1.957 | 98.615  | 0.049 | 88.5       | 90.3  | 92.0  | 95.3  | 98.6  | 101.8 | 104.9 | 106.3 | 107.9 |
| 5.5     | 1.957 | 101.419 | 0.049 | 90.9       | 92.8  | 94.5  | 98.0  | 101.4 | 104.7 | 107.9 | 109.4 | 111.0 |
| 6.0     | 1.957 | 104.019 | 0.050 | 93.1       | 95.1  | 96.9  | 100.5 | 104.0 | 107.4 | 110.7 | 112.2 | 113.9 |
| 6.5     | 1.957 | 106.532 | 0.050 | 95.3       | 97.4  | 99.2  | 102.9 | 106.5 | 110.0 | 113.4 | 115.0 | 116.7 |
| 7.0     | 1.957 | 109.090 | 0.050 | 97.6       | 99.7  | 101.5 | 105.4 | 109.1 | 112.7 | 116.2 | 117.8 | 119.6 |
| 7.5     | 1.957 | 111.808 | 0.050 | 100.0      | 102.2 | 104.1 | 108.0 | 111.8 | 115.5 | 119.1 | 120.7 | 122.6 |
| 8.0     | 1.957 | 114.754 | 0.050 | 102.6      | 104.8 | 106.8 | 110.8 | 114.8 | 118.5 | 122.2 | 123.9 | 125.8 |
| 8.5     | 1.957 | 118.055 | 0.050 | 105.6      | 107.9 | 109.9 | 114.0 | 118.1 | 121.9 | 125.7 | 127.5 | 129.4 |
| 9.0     | 1.957 | 121.611 | 0.050 | 108.8      | 111.2 | 113.2 | 117.5 | 121.6 | 125.6 | 129.5 | 131.3 | 133.3 |
| 9.5     | 1.957 | 125.314 | 0.050 | 112.2      | 114.6 | 116.7 | 121.1 | 125.3 | 129.4 | 133.4 | 135.2 | 137.3 |
| 10.0    | 1.957 | 128.835 | 0.049 | 115.4      | 117.9 | 120.1 | 124.5 | 128.8 | 133.0 | 137.1 | 138.9 | 141.0 |
| 10.5    | 1.957 | 131.843 | 0.049 | 118.3      | 120.8 | 122.9 | 127.5 | 131.8 | 136.1 | 140.2 | 142.1 | 144.2 |
| 11.0    | 1.957 | 134.302 | 0.049 | 120.6      | 123.1 | 125.3 | 129.9 | 134.3 | 138.6 | 142.7 | 144.6 | 146.8 |
| 11.5    | 1.957 | 136.285 | 0.048 | 122.5      | 125.1 | 127.3 | 131.8 | 136.3 | 140.6 | 144.8 | 146.7 | 148.8 |
| 12.0    | 1.957 | 137.855 | 0.048 | 124.1      | 126.6 | 128.8 | 133.4 | 137.9 | 142.2 | 146.4 | 148.3 | 150.4 |
| 12.5    | 1.957 | 139.081 | 0.047 | 125.3      | 127.8 | 130.0 | 134.6 | 139.1 | 143.4 | 147.6 | 149.5 | 151.7 |
| 13.0    | 1.957 | 140.046 | 0.047 | 126.2      | 128.8 | 131.0 | 135.6 | 140.0 | 144.4 | 148.6 | 150.5 | 152.7 |
| 13.5    | 1.957 | 140.843 | 0.047 | 127.0      | 129.6 | 131.8 | 136.4 | 140.8 | 145.2 | 149.4 | 151.3 | 153.5 |
| 14.0    | 1.957 | 141.517 | 0.047 | 127.7      | 130.3 | 132.5 | 137.1 | 141.5 | 145.8 | 150.0 | 152.0 | 154.1 |
| 14.5    | 1.957 | 142.094 | 0.046 | 128.3      | 130.8 | 133.0 | 137.6 | 142.1 | 146.4 | 150.6 | 152.6 | 154.7 |
| 15.0    | 1.957 | 142.590 | 0.046 | 128.8      | 131.3 | 133.5 | 138.1 | 142.6 | 146.9 | 151.1 | 153.0 | 155.2 |
| 15.5    | 1.957 | 142.985 | 0.046 | 129.2      | 131.7 | 133.9 | 138.5 | 143.0 | 147.3 | 151.5 | 153.4 | 155.6 |
| 16.0    | 1.957 | 143.275 | 0.046 | 129.5      | 132.0 | 134.2 | 138.8 | 143.3 | 147.6 | 151.8 | 153.7 | 155.9 |
| 16.5    | 1.957 | 143.492 | 0.046 | 129.7      | 132.3 | 134.5 | 139.0 | 143.5 | 147.8 | 152.0 | 153.9 | 156.1 |
| 17.0    | 1.957 | 143.667 | 0.046 | 129.9      | 132.4 | 134.6 | 139.2 | 143.7 | 148.0 | 152.2 | 154.1 | 156.3 |
| 17.5    | 1.957 | 143.794 | 0.046 | 130.0      | 132.6 | 134.8 | 139.3 | 143.8 | 148.1 | 152.3 | 154.2 | 156.4 |
| 18.0    | 1.957 | 143.852 | 0.046 | 130.1      | 132.6 | 134.8 | 139.4 | 143.9 | 148.2 | 152.4 | 154.3 | 156.5 |
| 18.5    | 1.957 | 143.912 | 0.046 | 130.1      | 132.7 | 134.9 | 139.5 | 143.9 | 148.2 | 152.4 | 154.4 | 156.5 |
| 19.0    | 1.957 | 144.109 | 0.046 | 130.3      | 132.9 | 135.1 | 139.7 | 144.1 | 148.4 | 152.6 | 154.6 | 156.7 |
| 19.5    | 1.957 | 144.417 | 0.045 | 130.7      | 133.2 | 135.4 | 140.0 | 144.4 | 148.7 | 152.9 | 154.9 | 157.0 |
| 20.0    | 1.957 | 144.766 | 0.045 | 131.0      | 133.6 | 135.7 | 140.3 | 144.8 | 149.1 | 153.3 | 155.2 | 157.4 |

**SUPPLEMENTAL TABLE 14** Head Circumference (Centimeters) for Age for Girls With DS, Aged 2 to 20 Years

| Age (y) | L     | M      | S     | Percentile |       |      |      |      |      |      |       |      |  |
|---------|-------|--------|-------|------------|-------|------|------|------|------|------|-------|------|--|
|         |       |        |       | 2nd        | 5th   | 10th | 25th | 50th | 75th | 90th | 95th  | 98th |  |
| 2.0     | 1.852 | 45.441 | 0.028 | 42.9       | 43.34 | 43.7 | 44.6 | 45.4 | 46.3 | 47.1 | 47.46 | 47.9 |  |
| 2.5     | 1.852 | 45.674 | 0.028 | 43.1       | 43.53 | 43.9 | 44.8 | 45.7 | 46.5 | 47.3 | 47.73 | 48.2 |  |
| 3.0     | 1.852 | 45.932 | 0.028 | 43.3       | 43.74 | 44.2 | 45.1 | 45.9 | 46.8 | 47.6 | 48.03 | 48.5 |  |
| 3.5     | 1.852 | 46.190 | 0.029 | 43.5       | 43.96 | 44.4 | 45.3 | 46.2 | 47.1 | 47.9 | 48.33 | 48.8 |  |
| 4.0     | 1.852 | 46.445 | 0.029 | 43.7       | 44.17 | 44.6 | 45.5 | 46.4 | 47.3 | 48.2 | 48.63 | 49.1 |  |
| 4.5     | 1.852 | 46.697 | 0.030 | 43.9       | 44.37 | 44.8 | 45.8 | 46.7 | 47.6 | 48.5 | 48.93 | 49.4 |  |
| 5.0     | 1.852 | 46.945 | 0.030 | 44.0       | 44.57 | 45.0 | 46.0 | 46.9 | 47.9 | 48.8 | 49.22 | 49.7 |  |
| 5.5     | 1.852 | 47.189 | 0.030 | 44.2       | 44.77 | 45.2 | 46.2 | 47.2 | 48.1 | 49.1 | 49.51 | 50.0 |  |
| 6.0     | 1.852 | 47.431 | 0.031 | 44.4       | 44.97 | 45.4 | 46.4 | 47.4 | 48.4 | 49.4 | 49.79 | 50.3 |  |
| 6.5     | 1.852 | 47.669 | 0.031 | 44.6       | 45.16 | 45.6 | 46.7 | 47.7 | 48.7 | 49.6 | 50.07 | 50.6 |  |
| 7.0     | 1.852 | 47.905 | 0.032 | 44.8       | 45.35 | 45.8 | 46.9 | 47.9 | 48.9 | 49.9 | 50.35 | 50.9 |  |
| 7.5     | 1.852 | 48.140 | 0.032 | 45.0       | 45.53 | 46.0 | 47.1 | 48.1 | 49.2 | 50.2 | 50.63 | 51.2 |  |
| 8.0     | 1.852 | 48.372 | 0.033 | 45.1       | 45.72 | 46.2 | 47.3 | 48.4 | 49.4 | 50.4 | 50.91 | 51.4 |  |
| 8.5     | 1.852 | 48.604 | 0.033 | 45.3       | 45.9  | 46.4 | 47.5 | 48.6 | 49.7 | 50.7 | 51.18 | 51.7 |  |
| 9.0     | 1.852 | 48.832 | 0.033 | 45.5       | 46.08 | 46.6 | 47.7 | 48.8 | 49.9 | 51.0 | 51.46 | 52.0 |  |
| 9.5     | 1.852 | 49.056 | 0.034 | 45.6       | 46.26 | 46.8 | 47.9 | 49.1 | 50.2 | 51.2 | 51.72 | 52.3 |  |
| 10.0    | 1.852 | 49.273 | 0.034 | 45.8       | 46.43 | 47.0 | 48.1 | 49.3 | 50.4 | 51.5 | 51.99 | 52.6 |  |
| 10.5    | 1.852 | 49.480 | 0.035 | 45.9       | 46.59 | 47.1 | 48.3 | 49.5 | 50.6 | 51.7 | 52.24 | 52.8 |  |
| 11.0    | 1.852 | 49.676 | 0.035 | 46.1       | 46.73 | 47.3 | 48.5 | 49.7 | 50.8 | 52.0 | 52.48 | 53.1 |  |
| 11.5    | 1.852 | 49.860 | 0.036 | 46.2       | 46.87 | 47.4 | 48.7 | 49.9 | 51.0 | 52.2 | 52.7  | 53.3 |  |
| 12.0    | 1.852 | 50.031 | 0.036 | 46.3       | 47    | 47.6 | 48.8 | 50.0 | 51.2 | 52.4 | 52.92 | 53.5 |  |
| 12.5    | 1.852 | 50.191 | 0.036 | 46.4       | 47.11 | 47.7 | 49.0 | 50.2 | 51.4 | 52.6 | 53.12 | 53.7 |  |
| 13.0    | 1.852 | 50.339 | 0.037 | 46.5       | 47.21 | 47.8 | 49.1 | 50.3 | 51.6 | 52.8 | 53.31 | 53.9 |  |
| 13.5    | 1.852 | 50.477 | 0.037 | 46.6       | 47.3  | 47.9 | 49.2 | 50.5 | 51.7 | 52.9 | 53.49 | 54.1 |  |
| 14.0    | 1.852 | 50.604 | 0.038 | 46.7       | 47.39 | 48.0 | 49.3 | 50.6 | 51.9 | 53.1 | 53.66 | 54.3 |  |
| 14.5    | 1.852 | 50.722 | 0.038 | 46.7       | 47.46 | 48.1 | 49.4 | 50.7 | 52.0 | 53.2 | 53.81 | 54.5 |  |
| 15.0    | 1.852 | 50.830 | 0.038 | 46.8       | 47.52 | 48.2 | 49.5 | 50.8 | 52.1 | 53.4 | 53.96 | 54.6 |  |
| 15.5    | 1.852 | 50.926 | 0.039 | 46.8       | 47.58 | 48.2 | 49.6 | 50.9 | 52.2 | 53.5 | 54.1  | 54.8 |  |
| 16.0    | 1.852 | 51.011 | 0.039 | 46.9       | 47.62 | 48.3 | 49.7 | 51.0 | 52.3 | 53.6 | 54.22 | 54.9 |  |
| 16.5    | 1.852 | 51.083 | 0.040 | 46.9       | 47.65 | 48.3 | 49.7 | 51.1 | 52.4 | 53.7 | 54.33 | 55.0 |  |
| 17.0    | 1.852 | 51.143 | 0.040 | 46.9       | 47.67 | 48.3 | 49.8 | 51.1 | 52.5 | 53.8 | 54.43 | 55.1 |  |
| 17.5    | 1.852 | 51.190 | 0.041 | 46.9       | 47.67 | 48.4 | 49.8 | 51.2 | 52.6 | 53.9 | 54.51 | 55.2 |  |
| 18.0    | 1.852 | 51.226 | 0.041 | 46.9       | 47.67 | 48.4 | 49.8 | 51.2 | 52.6 | 54.0 | 54.58 | 55.3 |  |
| 18.5    | 1.852 | 51.251 | 0.041 | 46.8       | 47.65 | 48.4 | 49.8 | 51.3 | 52.6 | 54.0 | 54.64 | 55.4 |  |
| 19.0    | 1.852 | 51.267 | 0.042 | 46.8       | 47.63 | 48.3 | 49.8 | 51.3 | 52.7 | 54.1 | 54.69 | 55.4 |  |
| 19.5    | 1.852 | 51.278 | 0.042 | 46.8       | 47.6  | 48.3 | 49.8 | 51.3 | 52.7 | 54.1 | 54.74 | 55.5 |  |
| 20.0    | 1.852 | 51.285 | 0.043 | 46.7       | 47.57 | 48.3 | 49.8 | 51.3 | 52.7 | 54.1 | 54.78 | 55.5 |  |

**SUPPLEMENTAL TABLE 15** BMI for Age for Girls With DS, Aged 2 to 20 Years

| Age (y) | L      | M      | S     | Percentile |      |      |      |      |      |      |      |      |
|---------|--------|--------|-------|------------|------|------|------|------|------|------|------|------|
|         |        |        |       | 2nd        | 5th  | 10th | 25th | 50th | 75th | 90th | 95th | 98th |
| 2.0     | -1.934 | 16.626 | 0.095 | 14.2       | 14.5 | 14.9 | 15.7 | 16.6 | 17.8 | 19.2 | 20.0 | 21.0 |
| 2.5     | -1.922 | 16.689 | 0.096 | 14.2       | 14.5 | 14.9 | 15.7 | 16.7 | 17.9 | 19.3 | 20.2 | 21.2 |
| 3.0     | -1.908 | 16.762 | 0.099 | 14.2       | 14.6 | 14.9 | 15.8 | 16.8 | 18.0 | 19.5 | 20.4 | 21.5 |
| 3.5     | -1.894 | 16.837 | 0.101 | 14.2       | 14.6 | 14.9 | 15.8 | 16.8 | 18.1 | 19.7 | 20.5 | 21.7 |
| 4.0     | -1.878 | 16.921 | 0.103 | 14.2       | 14.6 | 15.0 | 15.9 | 16.9 | 18.2 | 19.8 | 20.8 | 22.0 |
| 4.5     | -1.860 | 17.018 | 0.106 | 14.2       | 14.6 | 15.0 | 15.9 | 17.0 | 18.4 | 20.1 | 21.0 | 22.3 |
| 5.0     | -1.839 | 17.130 | 0.109 | 14.3       | 14.7 | 15.1 | 16.0 | 17.1 | 18.5 | 20.3 | 21.3 | 22.7 |
| 5.5     | -1.815 | 17.257 | 0.113 | 14.3       | 14.7 | 15.1 | 16.1 | 17.3 | 18.7 | 20.6 | 21.7 | 23.1 |
| 6.0     | -1.789 | 17.402 | 0.117 | 14.3       | 14.7 | 15.2 | 16.2 | 17.4 | 18.9 | 20.9 | 22.0 | 23.6 |
| 6.5     | -1.759 | 17.568 | 0.122 | 14.3       | 14.8 | 15.2 | 16.3 | 17.6 | 19.2 | 21.3 | 22.5 | 24.1 |
| 7.0     | -1.725 | 17.756 | 0.127 | 14.4       | 14.9 | 15.3 | 16.4 | 17.8 | 19.5 | 21.7 | 23.0 | 24.8 |
| 7.5     | -1.687 | 17.967 | 0.132 | 14.4       | 14.9 | 15.4 | 16.5 | 18.0 | 19.8 | 22.2 | 23.6 | 25.5 |
| 8.0     | -1.646 | 18.200 | 0.138 | 14.5       | 15.0 | 15.5 | 16.7 | 18.2 | 20.1 | 22.7 | 24.2 | 26.3 |
| 8.5     | -1.602 | 18.456 | 0.144 | 14.6       | 15.1 | 15.6 | 16.9 | 18.5 | 20.5 | 23.2 | 24.9 | 27.2 |
| 9.0     | -1.554 | 18.735 | 0.151 | 14.6       | 15.2 | 15.7 | 17.1 | 18.7 | 20.9 | 23.8 | 25.6 | 28.1 |
| 9.5     | -1.502 | 19.038 | 0.157 | 14.7       | 15.3 | 15.9 | 17.3 | 19.0 | 21.3 | 24.5 | 26.4 | 29.1 |
| 10.0    | -1.447 | 19.365 | 0.164 | 14.8       | 15.4 | 16.0 | 17.5 | 19.4 | 21.8 | 25.2 | 27.2 | 30.2 |
| 10.5    | -1.388 | 19.717 | 0.170 | 14.9       | 15.6 | 16.2 | 17.7 | 19.7 | 22.3 | 25.9 | 28.1 | 31.3 |
| 11.0    | -1.325 | 20.099 | 0.177 | 15.0       | 15.7 | 16.4 | 18.0 | 20.1 | 22.8 | 26.7 | 29.0 | 32.4 |
| 11.5    | -1.259 | 20.515 | 0.183 | 15.2       | 15.9 | 16.6 | 18.3 | 20.5 | 23.4 | 27.5 | 29.9 | 33.5 |
| 12.0    | -1.188 | 20.967 | 0.189 | 15.4       | 16.1 | 16.8 | 18.6 | 21.0 | 24.0 | 28.3 | 30.9 | 34.6 |
| 12.5    | -1.113 | 21.456 | 0.194 | 15.5       | 16.3 | 17.1 | 19.0 | 21.5 | 24.7 | 29.1 | 31.8 | 35.7 |
| 13.0    | -1.035 | 21.986 | 0.199 | 15.8       | 16.6 | 17.4 | 19.4 | 22.0 | 25.4 | 30.0 | 32.8 | 36.7 |
| 13.5    | -0.953 | 22.555 | 0.203 | 16.0       | 16.9 | 17.7 | 19.9 | 22.6 | 26.1 | 30.9 | 33.7 | 37.7 |
| 14.0    | -0.868 | 23.160 | 0.207 | 16.3       | 17.2 | 18.1 | 20.3 | 23.2 | 26.8 | 31.8 | 34.7 | 38.7 |
| 14.5    | -0.780 | 23.796 | 0.210 | 16.5       | 17.5 | 18.5 | 20.8 | 23.8 | 27.6 | 32.7 | 35.6 | 39.6 |
| 15.0    | -0.690 | 24.455 | 0.213 | 16.8       | 17.9 | 18.9 | 21.4 | 24.5 | 28.4 | 33.6 | 36.5 | 40.5 |
| 15.5    | -0.598 | 25.134 | 0.216 | 17.1       | 18.2 | 19.3 | 21.9 | 25.1 | 29.2 | 34.5 | 37.5 | 41.4 |
| 16.0    | -0.504 | 25.827 | 0.218 | 17.4       | 18.6 | 19.7 | 22.4 | 25.8 | 30.0 | 35.4 | 38.4 | 42.3 |
| 16.5    | -0.409 | 26.525 | 0.220 | 17.7       | 18.9 | 20.1 | 23.0 | 26.5 | 30.9 | 36.3 | 39.3 | 43.1 |
| 17.0    | -0.314 | 27.221 | 0.223 | 17.9       | 19.2 | 20.5 | 23.5 | 27.2 | 31.7 | 37.2 | 40.2 | 44.0 |
| 17.5    | -0.218 | 27.911 | 0.225 | 18.2       | 19.6 | 20.9 | 24.1 | 27.9 | 32.5 | 38.0 | 41.0 | 44.8 |
| 18.0    | -0.122 | 28.590 | 0.227 | 18.4       | 19.9 | 21.3 | 24.6 | 28.6 | 33.3 | 38.9 | 41.9 | 45.6 |
| 18.5    | -0.026 | 29.252 | 0.229 | 18.6       | 20.1 | 21.6 | 25.1 | 29.3 | 34.1 | 39.7 | 42.7 | 46.3 |
| 19.0    | 0.070  | 29.898 | 0.231 | 18.7       | 20.4 | 21.9 | 25.6 | 29.9 | 34.8 | 40.5 | 43.5 | 47.1 |
| 19.5    | 0.165  | 30.527 | 0.233 | 18.8       | 20.6 | 22.2 | 26.1 | 30.5 | 35.6 | 41.3 | 44.2 | 47.8 |
| 20.0    | 0.260  | 31.141 | 0.235 | 18.9       | 20.7 | 22.5 | 26.5 | 31.1 | 36.3 | 42.1 | 45.0 | 48.5 |

**SUPPLEMENTAL TABLE 16** Weight (Kilograms) for Age for Boys With DS, Aged 2 to 20 Years

| Age (y) | L      | M      | S     | Percentile |      |      |      |      |      |      |      |       |
|---------|--------|--------|-------|------------|------|------|------|------|------|------|------|-------|
|         |        |        |       | 2nd        | 5th  | 10th | 25th | 50th | 75th | 90th | 95th | 98th  |
| 2.0     | 0.357  | 11.227 | 0.129 | 8.6        | 9.0  | 9.4  | 10.3 | 11.2 | 12.2 | 13.3 | 13.8 | 14.4  |
| 2.5     | 0.335  | 12.053 | 0.129 | 9.2        | 9.7  | 10.1 | 11.0 | 12.1 | 13.1 | 14.3 | 14.8 | 15.4  |
| 3.0     | 0.316  | 12.794 | 0.130 | 9.7        | 10.2 | 10.7 | 11.7 | 12.8 | 13.9 | 15.2 | 15.7 | 16.4  |
| 3.5     | 0.296  | 13.540 | 0.132 | 10.3       | 10.8 | 11.3 | 12.4 | 13.5 | 14.8 | 16.1 | 16.7 | 17.5  |
| 4.0     | 0.272  | 14.421 | 0.134 | 10.9       | 11.5 | 12.0 | 13.2 | 14.4 | 15.8 | 17.2 | 17.9 | 18.7  |
| 4.5     | 0.244  | 15.519 | 0.138 | 11.7       | 12.3 | 12.9 | 14.1 | 15.5 | 17.0 | 18.6 | 19.3 | 20.3  |
| 5.0     | 0.211  | 16.788 | 0.143 | 12.5       | 13.2 | 13.8 | 15.2 | 16.8 | 18.4 | 20.2 | 21.1 | 22.2  |
| 5.5     | 0.177  | 18.144 | 0.149 | 13.3       | 14.1 | 14.8 | 16.4 | 18.1 | 20.0 | 22.1 | 23.1 | 24.3  |
| 6.0     | 0.141  | 19.510 | 0.157 | 14.1       | 15.0 | 15.8 | 17.6 | 19.5 | 21.6 | 24.0 | 25.1 | 26.5  |
| 6.5     | 0.105  | 20.845 | 0.165 | 14.9       | 15.8 | 16.7 | 18.7 | 20.8 | 23.3 | 25.9 | 27.3 | 28.9  |
| 7.0     | 0.069  | 22.176 | 0.174 | 15.6       | 16.6 | 17.5 | 19.7 | 22.2 | 24.9 | 27.9 | 29.5 | 31.3  |
| 7.5     | 0.031  | 23.598 | 0.184 | 16.3       | 17.4 | 18.4 | 20.9 | 23.6 | 26.7 | 30.1 | 31.9 | 34.0  |
| 8.0     | -0.009 | 25.116 | 0.194 | 17.0       | 18.3 | 19.4 | 22.1 | 25.1 | 28.6 | 32.5 | 34.6 | 37.1  |
| 8.5     | -0.051 | 26.684 | 0.204 | 17.8       | 19.1 | 20.4 | 23.3 | 26.7 | 30.6 | 35.1 | 37.4 | 40.3  |
| 9.0     | -0.094 | 28.231 | 0.213 | 18.6       | 20.0 | 21.3 | 24.5 | 28.2 | 32.6 | 37.7 | 40.3 | 43.6  |
| 9.5     | -0.138 | 29.758 | 0.222 | 19.3       | 20.8 | 22.3 | 25.7 | 29.8 | 34.6 | 40.3 | 43.3 | 47.1  |
| 10.0    | -0.184 | 31.328 | 0.230 | 20.2       | 21.7 | 23.3 | 26.9 | 31.3 | 36.6 | 42.9 | 46.4 | 50.6  |
| 10.5    | -0.233 | 32.985 | 0.237 | 21.1       | 22.7 | 24.3 | 28.2 | 33.0 | 38.7 | 45.8 | 49.6 | 54.5  |
| 11.0    | -0.286 | 34.775 | 0.243 | 22.1       | 23.8 | 25.5 | 29.7 | 34.8 | 41.0 | 48.8 | 53.1 | 58.6  |
| 11.5    | -0.343 | 36.770 | 0.247 | 23.3       | 25.1 | 26.9 | 31.3 | 36.8 | 43.6 | 52.2 | 57.0 | 63.2  |
| 12.0    | -0.404 | 39.001 | 0.250 | 24.7       | 26.7 | 28.5 | 33.2 | 39.0 | 46.3 | 55.8 | 61.1 | 68.1  |
| 12.5    | -0.468 | 41.506 | 0.250 | 26.5       | 28.5 | 30.5 | 35.4 | 41.5 | 49.4 | 59.6 | 65.5 | 73.3  |
| 13.0    | -0.535 | 44.301 | 0.247 | 28.6       | 30.7 | 32.7 | 37.8 | 44.3 | 52.6 | 63.7 | 70.1 | 78.6  |
| 13.5    | -0.602 | 47.266 | 0.242 | 30.9       | 33.1 | 35.2 | 40.5 | 47.3 | 56.0 | 67.7 | 74.5 | 83.8  |
| 14.0    | -0.669 | 50.198 | 0.235 | 33.3       | 35.6 | 37.8 | 43.2 | 50.2 | 59.2 | 71.4 | 78.6 | 88.3  |
| 14.5    | -0.734 | 52.932 | 0.227 | 35.8       | 38.1 | 40.3 | 45.9 | 52.9 | 62.1 | 74.5 | 81.9 | 91.9  |
| 15.0    | -0.795 | 55.349 | 0.218 | 38.0       | 40.4 | 42.6 | 48.2 | 55.3 | 64.6 | 77.1 | 84.5 | 94.7  |
| 15.5    | -0.851 | 57.423 | 0.210 | 40.1       | 42.4 | 44.7 | 50.3 | 57.4 | 66.7 | 79.1 | 86.5 | 96.7  |
| 16.0    | -0.901 | 59.186 | 0.203 | 41.8       | 44.2 | 46.4 | 52.1 | 59.2 | 68.4 | 80.8 | 88.1 | 98.2  |
| 16.5    | -0.945 | 60.664 | 0.198 | 43.4       | 45.7 | 47.9 | 53.6 | 60.7 | 69.8 | 82.1 | 89.5 | 99.5  |
| 17.0    | -0.983 | 61.875 | 0.193 | 44.6       | 46.9 | 49.2 | 54.8 | 61.9 | 71.0 | 83.3 | 90.5 | 100.6 |
| 17.5    | -1.014 | 62.827 | 0.190 | 45.6       | 47.9 | 50.2 | 55.8 | 62.8 | 71.9 | 84.1 | 91.4 | 101.4 |
| 18.0    | -1.039 | 63.548 | 0.187 | 46.3       | 48.7 | 50.9 | 56.5 | 63.5 | 72.6 | 84.8 | 92.0 | 102.0 |
| 18.5    | -1.057 | 64.075 | 0.185 | 46.9       | 49.2 | 51.5 | 57.1 | 64.1 | 73.1 | 85.3 | 92.5 | 102.4 |
| 19.0    | -1.070 | 64.446 | 0.183 | 47.3       | 49.6 | 51.9 | 57.4 | 64.4 | 73.5 | 85.6 | 92.8 | 102.7 |
| 19.5    | -1.079 | 64.693 | 0.183 | 47.6       | 49.9 | 52.1 | 57.7 | 64.7 | 73.7 | 85.8 | 93.0 | 102.9 |
| 20.0    | -1.084 | 64.846 | 0.182 | 47.7       | 50.0 | 52.3 | 57.9 | 64.8 | 73.9 | 85.9 | 93.1 | 103.0 |

**SUPPLEMENTAL TABLE 17** Height (Centimeters) for Age for Boys With DS, Aged 2 to 20 Years

| Age (y) | L     | M       | S     | Percentile |       |       |       |       |       |       |       |       |
|---------|-------|---------|-------|------------|-------|-------|-------|-------|-------|-------|-------|-------|
|         |       |         |       | 2nd        | 5th   | 10th  | 25th  | 50th  | 75th  | 90th  | 95th  | 98th  |
| 2.0     | 0.453 | 81.511  | 0.044 | 74.5       | 75.7  | 76.8  | 79.1  | 81.5  | 83.9  | 86.4  | 87.6  | 88.9  |
| 2.5     | 0.453 | 84.522  | 0.045 | 77.1       | 78.4  | 79.5  | 82.0  | 84.5  | 87.1  | 89.7  | 90.9  | 92.3  |
| 3.0     | 0.453 | 87.222  | 0.046 | 79.5       | 80.8  | 82.0  | 84.6  | 87.2  | 89.9  | 92.6  | 93.9  | 95.4  |
| 3.5     | 0.453 | 89.966  | 0.046 | 81.9       | 83.3  | 84.5  | 87.2  | 90.0  | 92.8  | 95.6  | 96.9  | 98.5  |
| 4.0     | 0.453 | 92.864  | 0.047 | 84.4       | 85.9  | 87.2  | 90.0  | 92.9  | 95.8  | 98.7  | 100.1 | 101.7 |
| 4.5     | 0.453 | 96.039  | 0.047 | 87.2       | 88.8  | 90.1  | 93.1  | 96.0  | 99.1  | 102.2 | 103.6 | 105.3 |
| 5.0     | 0.453 | 99.492  | 0.048 | 90.3       | 91.9  | 93.3  | 96.4  | 99.5  | 102.7 | 105.9 | 107.4 | 109.2 |
| 5.5     | 0.453 | 103.057 | 0.048 | 93.4       | 95.1  | 96.6  | 99.8  | 103.1 | 106.4 | 109.8 | 111.4 | 113.2 |
| 6.0     | 0.453 | 106.618 | 0.048 | 96.6       | 98.3  | 99.9  | 103.2 | 106.6 | 110.1 | 113.6 | 115.3 | 117.2 |
| 6.5     | 0.453 | 109.994 | 0.049 | 99.5       | 101.4 | 103.0 | 106.4 | 110.0 | 113.6 | 117.3 | 119.0 | 121.0 |
| 7.0     | 0.453 | 113.134 | 0.049 | 102.3      | 104.2 | 105.9 | 109.5 | 113.1 | 116.9 | 120.7 | 122.5 | 124.5 |
| 7.5     | 0.453 | 116.108 | 0.049 | 105.0      | 106.9 | 108.6 | 112.3 | 116.1 | 120.0 | 123.9 | 125.7 | 127.9 |
| 8.0     | 0.453 | 118.903 | 0.049 | 107.5      | 109.5 | 111.2 | 115.0 | 118.9 | 122.9 | 126.9 | 128.8 | 131.0 |
| 8.5     | 0.453 | 121.473 | 0.049 | 109.8      | 111.8 | 113.6 | 117.5 | 121.5 | 125.5 | 129.6 | 131.6 | 133.8 |
| 9.0     | 0.453 | 123.774 | 0.049 | 111.9      | 113.9 | 115.8 | 119.7 | 123.8 | 127.9 | 132.1 | 134.1 | 136.3 |
| 9.5     | 0.453 | 125.896 | 0.049 | 113.8      | 115.9 | 117.8 | 121.8 | 125.9 | 130.1 | 134.3 | 136.3 | 138.7 |
| 10.0    | 0.453 | 127.967 | 0.049 | 115.7      | 117.8 | 119.7 | 123.8 | 128.0 | 132.2 | 136.5 | 138.6 | 140.9 |
| 10.5    | 0.453 | 130.074 | 0.049 | 117.6      | 119.8 | 121.7 | 125.9 | 130.1 | 134.4 | 138.7 | 140.8 | 143.2 |
| 11.0    | 0.453 | 132.308 | 0.049 | 119.7      | 121.9 | 123.8 | 128.0 | 132.3 | 136.7 | 141.1 | 143.2 | 145.6 |
| 11.5    | 0.453 | 134.804 | 0.049 | 122.0      | 124.3 | 126.2 | 130.5 | 134.8 | 139.2 | 143.7 | 145.8 | 148.3 |
| 12.0    | 0.453 | 137.688 | 0.048 | 124.8      | 127.0 | 129.0 | 133.3 | 137.7 | 142.2 | 146.7 | 148.9 | 151.3 |
| 12.5    | 0.453 | 140.900 | 0.048 | 127.8      | 130.1 | 132.1 | 136.4 | 140.9 | 145.4 | 150.0 | 152.2 | 154.7 |
| 13.0    | 0.453 | 144.212 | 0.047 | 130.9      | 133.2 | 135.3 | 139.7 | 144.2 | 148.8 | 153.5 | 155.7 | 158.2 |
| 13.5    | 0.453 | 147.259 | 0.047 | 133.9      | 136.2 | 138.2 | 142.7 | 147.3 | 151.9 | 156.6 | 158.8 | 161.4 |
| 14.0    | 0.453 | 149.772 | 0.046 | 136.3      | 138.6 | 140.7 | 145.2 | 149.8 | 154.4 | 159.1 | 161.4 | 164.0 |
| 14.5    | 0.453 | 151.719 | 0.046 | 138.2      | 140.5 | 142.6 | 147.1 | 151.7 | 156.4 | 161.1 | 163.4 | 165.9 |
| 15.0    | 0.453 | 153.148 | 0.045 | 139.6      | 142.0 | 144.0 | 148.6 | 153.1 | 157.8 | 162.6 | 164.8 | 167.4 |
| 15.5    | 0.453 | 154.182 | 0.045 | 140.6      | 143.0 | 145.1 | 149.6 | 154.2 | 158.8 | 163.6 | 165.8 | 168.4 |
| 16.0    | 0.453 | 154.895 | 0.045 | 141.4      | 143.7 | 145.8 | 150.3 | 154.9 | 159.6 | 164.3 | 166.5 | 169.1 |
| 16.5    | 0.453 | 155.347 | 0.045 | 141.8      | 144.2 | 146.2 | 150.8 | 155.3 | 160.0 | 164.8 | 167.0 | 169.6 |
| 17.0    | 0.453 | 155.599 | 0.045 | 142.1      | 144.4 | 146.5 | 151.0 | 155.6 | 160.3 | 165.0 | 167.2 | 169.8 |
| 17.5    | 0.453 | 155.703 | 0.045 | 142.2      | 144.5 | 146.6 | 151.1 | 155.7 | 160.4 | 165.1 | 167.3 | 169.9 |
| 18.0    | 0.453 | 155.734 | 0.045 | 142.2      | 144.5 | 146.6 | 151.1 | 155.7 | 160.4 | 165.1 | 167.4 | 169.9 |
| 18.5    | 0.453 | 155.846 | 0.045 | 142.3      | 144.7 | 146.7 | 151.3 | 155.8 | 160.5 | 165.2 | 167.5 | 170.1 |
| 19.0    | 0.453 | 156.016 | 0.044 | 142.5      | 144.8 | 146.9 | 151.4 | 156.0 | 160.7 | 165.4 | 167.7 | 170.2 |
| 19.5    | 0.453 | 156.239 | 0.044 | 142.7      | 145.1 | 147.1 | 151.7 | 156.2 | 160.9 | 165.6 | 167.9 | 170.4 |
| 20.0    | 0.453 | 156.491 | 0.044 | 143.0      | 145.3 | 147.4 | 151.9 | 156.5 | 161.2 | 165.9 | 168.1 | 170.7 |

**SUPPLEMENTAL TABLE 18** Head Circumference (Centimeters) for Age for Boys With DS, Aged 2 to 20 Years

| Age (y) | L      | M      | S     | Percentile |      |      |      |      |      |      |      |      |
|---------|--------|--------|-------|------------|------|------|------|------|------|------|------|------|
|         |        |        |       | 2nd        | 5th  | 10th | 25th | 50th | 75th | 90th | 95th | 98th |
| 2.0     | 5.251  | 45.873 | 0.028 | 42.9       | 43.5 | 44.0 | 45.0 | 45.9 | 46.7 | 47.5 | 47.8 | 48.2 |
| 2.5     | 5.383  | 46.361 | 0.028 | 43.3       | 43.9 | 44.4 | 45.4 | 46.4 | 47.2 | 48.0 | 48.3 | 48.7 |
| 3.0     | 5.437  | 46.643 | 0.028 | 43.6       | 44.2 | 44.7 | 45.7 | 46.6 | 47.5 | 48.3 | 48.6 | 49.0 |
| 3.5     | 5.456  | 46.846 | 0.029 | 43.7       | 44.4 | 44.9 | 45.9 | 46.8 | 47.7 | 48.5 | 48.8 | 49.2 |
| 4.0     | 5.455  | 47.075 | 0.029 | 43.9       | 44.6 | 45.1 | 46.1 | 47.1 | 47.9 | 48.7 | 49.1 | 49.5 |
| 4.5     | 5.421  | 47.410 | 0.029 | 44.2       | 44.9 | 45.4 | 46.5 | 47.4 | 48.3 | 49.1 | 49.5 | 49.9 |
| 5.0     | 5.329  | 47.847 | 0.029 | 44.6       | 45.3 | 45.8 | 46.9 | 47.8 | 48.7 | 49.6 | 49.9 | 50.3 |
| 5.5     | 5.170  | 48.286 | 0.029 | 45.0       | 45.7 | 46.2 | 47.3 | 48.3 | 49.2 | 50.0 | 50.4 | 50.8 |
| 6.0     | 4.963  | 48.661 | 0.029 | 45.4       | 46.0 | 46.6 | 47.7 | 48.7 | 49.6 | 50.4 | 50.8 | 51.2 |
| 6.5     | 4.761  | 48.917 | 0.029 | 45.6       | 46.3 | 46.8 | 47.9 | 48.9 | 49.8 | 50.7 | 51.1 | 51.5 |
| 7.0     | 4.586  | 49.093 | 0.030 | 45.8       | 46.5 | 47.0 | 48.1 | 49.1 | 50.0 | 50.9 | 51.3 | 51.7 |
| 7.5     | 4.423  | 49.237 | 0.030 | 46.0       | 46.6 | 47.1 | 48.2 | 49.2 | 50.2 | 51.1 | 51.5 | 51.9 |
| 8.0     | 4.265  | 49.364 | 0.030 | 46.1       | 46.7 | 47.3 | 48.4 | 49.4 | 50.3 | 51.2 | 51.6 | 52.1 |
| 8.5     | 4.101  | 49.486 | 0.030 | 46.2       | 46.9 | 47.4 | 48.5 | 49.5 | 50.4 | 51.3 | 51.7 | 52.2 |
| 9.0     | 3.951  | 49.592 | 0.030 | 46.3       | 47.0 | 47.5 | 48.6 | 49.6 | 50.6 | 51.5 | 51.9 | 52.3 |
| 9.5     | 3.798  | 49.693 | 0.030 | 46.4       | 47.1 | 47.6 | 48.7 | 49.7 | 50.7 | 51.6 | 52.0 | 52.4 |
| 10.0    | 3.617  | 49.808 | 0.030 | 46.6       | 47.2 | 47.7 | 48.8 | 49.8 | 50.8 | 51.7 | 52.1 | 52.6 |
| 10.5    | 3.379  | 49.952 | 0.030 | 46.7       | 47.3 | 47.8 | 48.9 | 50.0 | 50.9 | 51.9 | 52.3 | 52.8 |
| 11.0    | 3.059  | 50.137 | 0.030 | 46.9       | 47.5 | 48.0 | 49.1 | 50.1 | 51.1 | 52.1 | 52.5 | 53.0 |
| 11.5    | 2.633  | 50.374 | 0.030 | 47.2       | 47.8 | 48.3 | 49.3 | 50.4 | 51.4 | 52.3 | 52.8 | 53.3 |
| 12.0    | 2.105  | 50.651 | 0.030 | 47.5       | 48.0 | 48.5 | 49.6 | 50.7 | 51.7 | 52.7 | 53.1 | 53.6 |
| 12.5    | 1.490  | 50.955 | 0.031 | 47.8       | 48.4 | 48.9 | 49.9 | 51.0 | 52.0 | 53.0 | 53.5 | 54.0 |
| 13.0    | 0.769  | 51.312 | 0.031 | 48.2       | 48.7 | 49.2 | 50.3 | 51.3 | 52.4 | 53.4 | 53.9 | 54.5 |
| 13.5    | -0.032 | 51.717 | 0.031 | 48.6       | 49.2 | 49.6 | 50.7 | 51.7 | 52.8 | 53.9 | 54.4 | 55.0 |
| 14.0    | -0.814 | 52.094 | 0.031 | 49.0       | 49.5 | 50.0 | 51.0 | 52.1 | 53.2 | 54.3 | 54.9 | 55.5 |
| 14.5    | -1.501 | 52.400 | 0.031 | 49.4       | 49.9 | 50.3 | 51.3 | 52.4 | 53.5 | 54.7 | 55.3 | 56.0 |
| 15.0    | -2.063 | 52.636 | 0.031 | 49.6       | 50.1 | 50.6 | 51.6 | 52.6 | 53.8 | 55.0 | 55.6 | 56.3 |
| 15.5    | -2.554 | 52.842 | 0.031 | 49.8       | 50.3 | 50.8 | 51.8 | 52.8 | 54.0 | 55.2 | 55.9 | 56.6 |
| 16.0    | -2.994 | 53.029 | 0.032 | 50.0       | 50.5 | 51.0 | 52.0 | 53.0 | 54.2 | 55.5 | 56.1 | 56.9 |
| 16.5    | -3.355 | 53.183 | 0.032 | 50.2       | 50.7 | 51.1 | 52.1 | 53.2 | 54.4 | 55.7 | 56.3 | 57.1 |
| 17.0    | -3.640 | 53.306 | 0.032 | 50.3       | 50.8 | 51.2 | 52.2 | 53.3 | 54.5 | 55.8 | 56.5 | 57.3 |
| 17.5    | -3.826 | 53.386 | 0.032 | 50.4       | 50.9 | 51.3 | 52.3 | 53.4 | 54.6 | 55.9 | 56.6 | 57.4 |
| 18.0    | -3.902 | 53.419 | 0.032 | 50.5       | 50.9 | 51.4 | 52.3 | 53.4 | 54.6 | 56.0 | 56.6 | 57.5 |
| 18.5    | -3.932 | 53.431 | 0.032 | 50.5       | 50.9 | 51.4 | 52.4 | 53.4 | 54.6 | 56.0 | 56.7 | 57.5 |
| 19.0    | -3.965 | 53.446 | 0.032 | 50.5       | 51.0 | 51.4 | 52.4 | 53.4 | 54.6 | 56.0 | 56.7 | 57.5 |
| 19.5    | -3.995 | 53.459 | 0.032 | 50.5       | 51.0 | 51.4 | 52.4 | 53.5 | 54.7 | 56.0 | 56.7 | 57.5 |
| 20.0    | -4.024 | 53.471 | 0.032 | 50.5       | 51.0 | 51.4 | 52.4 | 53.5 | 54.7 | 56.0 | 56.7 | 57.5 |

**SUPPLEMENTAL TABLE 19** BMI for Age for Boys With DS, Aged 2 to 20 Years

| Age (y) | L      | M      | S     | Percentile |      |      |      |      |      |      |      |      |
|---------|--------|--------|-------|------------|------|------|------|------|------|------|------|------|
|         |        |        |       | 2nd        | 5th  | 10th | 25th | 50th | 75th | 90th | 95th | 98th |
| 2.0     | -1.435 | 16.777 | 0.098 | 14.1       | 14.5 | 14.9 | 15.8 | 16.8 | 18.0 | 19.4 | 20.2 | 21.1 |
| 2.5     | -1.435 | 16.784 | 0.098 | 14.1       | 14.5 | 14.9 | 15.8 | 16.8 | 18.0 | 19.4 | 20.2 | 21.2 |
| 3.0     | -1.435 | 16.792 | 0.099 | 14.1       | 14.5 | 14.9 | 15.8 | 16.8 | 18.0 | 19.4 | 20.2 | 21.2 |
| 3.5     | -1.435 | 16.802 | 0.099 | 14.1       | 14.5 | 14.9 | 15.8 | 16.8 | 18.0 | 19.5 | 20.2 | 21.2 |
| 4.0     | -1.435 | 16.820 | 0.100 | 14.1       | 14.5 | 14.9 | 15.8 | 16.8 | 18.0 | 19.5 | 20.3 | 21.3 |
| 4.5     | -1.435 | 16.850 | 0.101 | 14.1       | 14.5 | 14.9 | 15.8 | 16.8 | 18.1 | 19.6 | 20.4 | 21.4 |
| 5.0     | -1.435 | 16.892 | 0.102 | 14.1       | 14.5 | 14.9 | 15.8 | 16.9 | 18.1 | 19.7 | 20.5 | 21.5 |
| 5.5     | -1.435 | 16.949 | 0.104 | 14.1       | 14.5 | 14.9 | 15.9 | 16.9 | 18.2 | 19.8 | 20.6 | 21.7 |
| 6.0     | -1.435 | 17.023 | 0.107 | 14.1       | 14.6 | 15.0 | 15.9 | 17.0 | 18.3 | 20.0 | 20.8 | 22.0 |
| 6.5     | -1.435 | 17.114 | 0.110 | 14.1       | 14.6 | 15.0 | 16.0 | 17.1 | 18.5 | 20.2 | 21.1 | 22.3 |
| 7.0     | -1.435 | 17.229 | 0.113 | 14.2       | 14.6 | 15.0 | 16.0 | 17.2 | 18.7 | 20.4 | 21.4 | 22.7 |
| 7.5     | -1.435 | 17.371 | 0.118 | 14.2       | 14.6 | 15.1 | 16.1 | 17.4 | 18.9 | 20.8 | 21.8 | 23.2 |
| 8.0     | -1.435 | 17.545 | 0.123 | 14.2       | 14.7 | 15.1 | 16.2 | 17.5 | 19.1 | 21.1 | 22.3 | 23.8 |
| 8.5     | -1.435 | 17.753 | 0.129 | 14.3       | 14.8 | 15.2 | 16.4 | 17.8 | 19.5 | 21.6 | 22.8 | 24.5 |
| 9.0     | -1.435 | 17.996 | 0.135 | 14.3       | 14.8 | 15.3 | 16.5 | 18.0 | 19.8 | 22.2 | 23.5 | 25.3 |
| 9.5     | -1.435 | 18.270 | 0.141 | 14.4       | 15.0 | 15.5 | 16.7 | 18.3 | 20.2 | 22.7 | 24.2 | 26.2 |
| 10.0    | -1.435 | 18.577 | 0.147 | 14.5       | 15.1 | 15.6 | 16.9 | 18.6 | 20.7 | 23.4 | 25.0 | 27.3 |
| 10.5    | -1.435 | 18.915 | 0.154 | 14.7       | 15.2 | 15.8 | 17.2 | 18.9 | 21.1 | 24.1 | 25.9 | 28.4 |
| 11.0    | -1.435 | 19.284 | 0.160 | 14.8       | 15.4 | 16.0 | 17.5 | 19.3 | 21.6 | 24.9 | 26.8 | 29.6 |
| 11.5    | -1.435 | 19.686 | 0.165 | 15.0       | 15.6 | 16.3 | 17.8 | 19.7 | 22.2 | 25.7 | 27.8 | 30.8 |
| 12.0    | -1.435 | 20.122 | 0.170 | 15.2       | 15.9 | 16.5 | 18.1 | 20.1 | 22.8 | 26.5 | 28.8 | 32.1 |
| 12.5    | -1.435 | 20.596 | 0.175 | 15.5       | 16.2 | 16.8 | 18.5 | 20.6 | 23.4 | 27.3 | 29.8 | 33.4 |
| 13.0    | -1.435 | 21.107 | 0.178 | 15.8       | 16.5 | 17.2 | 18.9 | 21.1 | 24.0 | 28.2 | 30.9 | 34.8 |
| 13.5    | -1.435 | 21.651 | 0.181 | 16.2       | 16.9 | 17.6 | 19.4 | 21.7 | 24.7 | 29.1 | 31.9 | 36.0 |
| 14.0    | -1.435 | 22.212 | 0.182 | 16.6       | 17.3 | 18.0 | 19.9 | 22.2 | 25.4 | 30.0 | 32.9 | 37.2 |
| 14.5    | -1.435 | 22.774 | 0.183 | 17.0       | 17.7 | 18.5 | 20.3 | 22.8 | 26.1 | 30.8 | 33.8 | 38.3 |
| 15.0    | -1.435 | 23.320 | 0.184 | 17.4       | 18.1 | 18.9 | 20.8 | 23.3 | 26.7 | 31.5 | 34.7 | 39.3 |
| 15.5    | -1.435 | 23.836 | 0.184 | 17.7       | 18.5 | 19.3 | 21.3 | 23.8 | 27.3 | 32.2 | 35.4 | 40.2 |
| 16.0    | -1.435 | 24.319 | 0.184 | 18.1       | 18.9 | 19.7 | 21.7 | 24.3 | 27.8 | 32.9 | 36.1 | 41.0 |
| 16.5    | -1.435 | 24.767 | 0.183 | 18.4       | 19.3 | 20.1 | 22.1 | 24.8 | 28.3 | 33.5 | 36.8 | 41.7 |
| 17.0    | -1.435 | 25.175 | 0.183 | 18.8       | 19.6 | 20.4 | 22.5 | 25.2 | 28.8 | 34.0 | 37.3 | 42.3 |
| 17.5    | -1.435 | 25.539 | 0.182 | 19.0       | 19.9 | 20.7 | 22.8 | 25.5 | 29.2 | 34.4 | 37.8 | 42.8 |
| 18.0    | -1.435 | 25.859 | 0.182 | 19.3       | 20.2 | 21.0 | 23.1 | 25.9 | 29.5 | 34.8 | 38.2 | 43.2 |
| 18.5    | -1.435 | 26.140 | 0.181 | 19.5       | 20.4 | 21.2 | 23.4 | 26.1 | 29.9 | 35.2 | 38.6 | 43.6 |
| 19.0    | -1.435 | 26.388 | 0.181 | 19.7       | 20.6 | 21.4 | 23.6 | 26.4 | 30.1 | 35.5 | 38.9 | 44.0 |
| 19.5    | -1.435 | 26.611 | 0.181 | 19.9       | 20.8 | 21.6 | 23.8 | 26.6 | 30.4 | 35.8 | 39.2 | 44.3 |
| 20.0    | -1.435 | 26.814 | 0.180 | 20.0       | 20.9 | 21.8 | 24.0 | 26.8 | 30.6 | 36.0 | 39.5 | 44.6 |
